# Supplementary material for: Outpatient parenteral antimicrobial therapy (OPAT) versus inpatient care in the UK: a health economic assessment for six key diagnoses
Source: PubMed Central journal article supplement — BMJ Open. 2021 Sep 28;11(9):e049733. doi: 10.1136/bmjopen-2021-049733 (PMC8479950; doi:10.1136/bmjopen-2021-049733), 2021-09-28
Supplement: bmjopen-2021-049733.draft_revisions.pdf [file bmjopen-2021-049733.draft_revisions.pdf]

# BMJ Open

BMJ Open is committed to open peer review. As part of this commitment we make the peer review history of every article we publish publicly available.

When an article is published we post the peer reviewers' comments and the authors' responses online. We also post the versions of the paper that were used during peer review. These are the versions that the peer review comments apply to.

The versions of the paper that follow are the versions that were submitted during the peer review process. They are not the versions of record or the final published versions. They should not be cited or distributed as the published version of this manuscript.

BMJ Open is an open access journal and the full, final, typeset and author-corrected version of record of the manuscript is available on our site with no access controls, subscription charges or pay-per-view fees (<http://bmjopen.bmj.com>).

If you have any questions on BMJ Open's open peer review process please email [info.bmjopen@bmj.com](mailto:info.bmjopen@bmj.com)

# BMJ Open

## Outpatient parenteral antimicrobial therapy (OPAT) versus inpatient care in the UK: a health economic assessment for six key diagnoses

|                               |                                                                                                                                                                                                                                                                                                             |
|-------------------------------|-------------------------------------------------------------------------------------------------------------------------------------------------------------------------------------------------------------------------------------------------------------------------------------------------------------|
| Journal:                      | <i>BMJ Open</i>                                                                                                                                                                                                                                                                                             |
| Manuscript ID                 | bmjopen-2021-049733                                                                                                                                                                                                                                                                                         |
| Article Type:                 | Original research                                                                                                                                                                                                                                                                                           |
| Date Submitted by the Author: | 31-Jan-2021                                                                                                                                                                                                                                                                                                 |
| Complete List of Authors:     | Dimitrova, Maria; Healthcare Improvement Scotland, Scottish Health Technology Group<br>Gilchrist, Mark; Imperial College Healthcare NHS Trust<br>Seaton, R. A.; Queen Elizabeth University Hospital, Infectious diseases; Healthcare Improvement Scotland Glasgow, Scottish Antimicrobial Prescribing Group |
| Keywords:                     | INFECTIOUS DISEASES, HEALTH ECONOMICS, Organisation of health services < HEALTH SERVICES ADMINISTRATION & MANAGEMENT, HEALTH SERVICES ADMINISTRATION & MANAGEMENT, Quality in health care < HEALTH SERVICES ADMINISTRATION & MANAGEMENT                                                                     |
|                               |                                                                                                                                                                                                                                                                                                             |

SCHOLARONE™  
Manuscripts

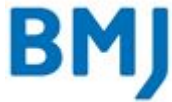

I, the Submitting Author has the right to grant and does grant on behalf of all authors of the Work (as defined in the below author licence), an exclusive licence and/or a non-exclusive licence for contributions from authors who are: i) UK Crown employees; ii) where BMJ has agreed a CC-BY licence shall apply, and/or iii) in accordance with the terms applicable for US Federal Government officers or employees acting as part of their official duties; on a worldwide, perpetual, irrevocable, royalty-free basis to BMJ Publishing Group Ltd ("BMJ") its licensees and where the relevant Journal is co-owned by BMJ to the co-owners of the Journal, to publish the Work in this journal and any other BMJ products and to exploit all rights, as set out in our [licence](#).

The Submitting Author accepts and understands that any supply made under these terms is made by BMJ to the Submitting Author unless you are acting as an employee on behalf of your employer or a postgraduate student of an affiliated institution which is paying any applicable article publishing charge ("APC") for Open Access articles. Where the Submitting Author wishes to make the Work available on an Open Access basis (and intends to pay the relevant APC), the terms of reuse of such Open Access shall be governed by a Creative Commons licence – details of these licences and which [Creative Commons](#) licence will apply to this Work are set out in our licence referred to above.

Other than as permitted in any relevant BMJ Author's Self Archiving Policies, I confirm this Work has not been accepted for publication elsewhere, is not being considered for publication elsewhere and does not duplicate material already published. I confirm all authors consent to publication of this Work and authorise the granting of this licence.

1  
2  
3  
4  
5  
6  
7  
8  
9  
10  
11  
12  
13  
14  
15  
16  
17  
18  
19  
20  
21  
22  
23  
24  
25  
26  
27  
28  
29  
30  
31  
32  
33  
34  
35  
36  
37  
38  
39  
40  
41  
42  
43  
44  
45  
46  
47  
48  
49  
50  
51  
52  
53  
54  
55  
56  
57  
58  
59  
60

## Outpatient parenteral antimicrobial therapy (OPAT) versus inpatient care in the UK: a health economic assessment for six key diagnoses

Maria Dimitrova<sup>1</sup>, Mark Gilchrist<sup>2</sup> R Andrew Seaton<sup>3, 4</sup>

1. Healthcare Improvement Scotland, Scottish Health Technology Group, Edinburgh
2. Department of Infection / Pharmacy, Imperial College Healthcare NHS Trust, London
3. Infection unit, Queen Elizabeth University Hospital, NHS Greater Glasgow and Clyde, Glasgow
4. Healthcare Improvement Scotland, Scottish Antimicrobial Prescribing Group, Glasgow

Correspondence to: Dr R Andrew Seaton, Consultant in Infectious diseases, Queen Elizabeth University Hospital, 1345 Govan Road, Glasgow, G514TF  
Email: [andrew.seaton@ggc.scot.nhs.uk](mailto:andrew.seaton@ggc.scot.nhs.uk)

## Abstract:

**Objectives** To compare costs associated with different models of outpatient parenteral antimicrobial therapy (OPAT) delivery with costs of inpatient care across six key infection groups typically managed via OPAT in the UK.

**Design** The analysis used a cost-minimisation design due to evidence of similarities in patient and treatment outcomes between OPAT and inpatient care. A bottom-up approach was undertaken for the evaluation of costs associated with OPAT. The British Society of Antimicrobial Chemotherapy (BSAC) National Outcomes Registry System (NORS) was used to determine the key infection diagnoses, mean duration of treatment episodes and (with expert consensus) most frequent antibiotics used.

**Setting** Several OPAT delivery settings were considered in the costing analysis including outpatient clinic and care at the home and were compared with inpatient care.

**Interventions** The OPAT models considered in the analysis were outpatient clinic model, nurse home visits, self (or carer)-administration by a bolus IV, self-administration by a commercially pre-filled elastomeric device, continuous intravenous infusion (CIVI) of piperacillin with tazobactam or flucloxacillin with elastomeric device as outpatient once daily and, specifically for bone and joint and diabetic foot infections, complex outpatient oral antibiotic therapies.

**Results** Base case and a range of scenario results from the analysis showed all evaluated OPAT service delivery models to be consistently less costly than inpatient stay of equivalent duration across a range of key infections in the UK. Main costs of OPAT were associated with staff time and antimicrobial medications. The extent of savings associated with OPAT varies with selected models of healthcare delivery.

**Conclusions** OPAT is a cost-effective use of National Health Service (NHS) resources for the treatment of a range of infections in the UK in patients who can be safely managed in a non-inpatient setting.

## Strengths and limitations of this study

- First study to use a bottom-up costing approach applied across a range of infections and healthcare delivery models in OPAT using UK-specific registry data
- First study to compare the cost of various models of care in OPAT with inpatient stay
- Base case results were consistent across a range of scenario analyses
- Assumed equivalence in OPAT and inpatient outcomes and between different OPAT models of care is associated with some uncertainty
- There are uncertainties in the quantification of some indirect OPAT costs (and their contribution to each OPAT model) and with inpatient bed day costs stay

## INTRODUCTION

Outpatient parenteral antimicrobial therapy (OPAT) is a well-established and safe method of delivering intravenous antimicrobial therapy to carefully selected patients in whom other aspects of care can be addressed without hospitalisation.<sup>1 2</sup> The British Society of Antimicrobial Chemotherapy (BSAC) have developed good practice recommendations for safe adult and paediatric OPAT practice and clinical governance including promotion of antimicrobial stewardship.<sup>2</sup> The recommendations acknowledged that a variety of OPAT delivery models were available and widely practised in the UK including home or clinic administration, administration by nurse or self/carer and administration via bolus or infusion. In 2015 BSAC launched the National Outcomes Registry System (NORS) for UK OPAT services in order to describe the OPAT landscape (including infections treated and antimicrobials used) and to enable participating centres to benchmark practice and outcomes.<sup>3</sup> Despite popularity and growth in OPAT practice in the UK, funding/reimbursement of OPAT has been inconsistent and as a result OPAT has not been uniformly established. A previous publication attempted to describe cost-effectiveness of OPAT in a tariff based UK health model for a single condition (cellulitis).<sup>4</sup> Herein we estimate OPAT related costs for a number of key indicator conditions utilising different established OPAT delivery models and compare with reference inpatient costs. The analysis also set out to take into account evolution of practice with greater use of supervised complex oral antibiotic therapies within the OPAT setting.<sup>5</sup>

## METHODS

The costs of six OPAT healthcare delivery models were estimated and compared against the cost of equivalent duration of inpatient stay for six key infection categories typically managed via OPAT in the UK. Based on available clinical evidence and clinical expert opinion, equivalence in patient outcomes was assumed for OPAT and inpatient stay as well as for the different models of healthcare delivery in OPAT.<sup>6-8</sup> A cost-minimisation analysis was therefore

deemed appropriate. A list of detailed costing model assumptions primarily based on the BSAC updated good practice recommendations<sup>2</sup> and clinical expert opinion is available in the supplementary materials (Table S1).

### NORS data

The cost-minimisation analysis used five years of retrospective data relating to 21,632 adult treatment episodes collected from 57 OPAT centres (44 in England, 5 in Scotland, 4 in Wales and 4 in Northern Ireland), that all reported to NORS<sup>3</sup> (Table 1). In the cost-minimisation model, patients were treated in OPAT for one of six broadly defined infection categories, representing approximately 82% of primary OPAT diagnoses recorded in NORS. These were infections requiring short-term (up to 7 days) antimicrobial treatment such as skin and soft tissue infections including cellulitis (SSTI) and complex urinary tract infections (UTI) (including drug resistant lower UTI and pyelonephritis) or longer-term antimicrobial treatment such as bone and joint (including spinal, native osteomyelitis and orthopaedic metal work associated infections), diabetic foot infections (both osteomyelitis and complex soft tissue infections), bronchiectasis, and intra-abdominal infections (including liver abscess and other abdominal and pelvic infections)(Table S2).

**Table 1 Average duration and total number of treatment episodes in OPAT for six categories of infection**

| Condition       | Average duration<br>(days) | Total number | Source                         |
|-----------------|----------------------------|--------------|--------------------------------|
| SSTI            | 6.4                        | 7,371        | NORS 2015-19 (UK) <sup>3</sup> |
| Complex UTI     | 7.0                        | 1,896        |                                |
| Bone-Joint      | 27.8                       | 5,355        |                                |
| Diabetic foot   | 28.3                       | 1,797        |                                |
| Bronchiectasis  | 11.0                       | 4,096        |                                |
| Intra-abdominal | 22.2                       | 1,117        |                                |

*SSTI, skin and soft tissue infections; UTI, urinary tract infections; NORS, National Outcomes Registry System*

### OPAT healthcare delivery models

1  
2  
3 The OPAT models considered were based on those currently practiced in the UK: outpatient  
4 clinic model, nurse home visits, self (or carer)-administration by a bolus IV, self-  
5 administration via an elastomeric device including continuous intravenous infusion (CIVI) of  
6 piperacillin with tazobactam or flucloxacillin and (for bone and joint or diabetic foot  
7 infections) complex outpatient antibiotic therapy (COpAT). Only suitable healthcare models  
8 were considered for the treatment of each of the six conditions in OPAT.  
9  
10  
11  
12  
13  
14

15 The care pathway for the outpatient clinic model requires a patient to travel daily to the  
16 OPAT unit following an initial assessment in hospital. At the clinic, an OPAT nurse prepares  
17 and administers antimicrobial medication intravenously by bolus IV. The nurse home visit  
18 model entails a specialist nurse (or a community based nurse) travelling to the patient's  
19 home instead.  
20  
21  
22  
23  
24

25 The self-administration model of OPAT care requires the patient (or carer) to administer the  
26 antimicrobials at home, without the need to travel to hospital or for a nurse to visit on a  
27 daily basis. It is assumed that prior to commencing antimicrobial self-administration,  
28 patients (or their carers) receive on average three training sessions (60 minutes each with a  
29 nurse) on how to safely prepare and administer their medication through a peripherally  
30 inserted central catheter (PICC) line using a bolus IV. It is further assumed that only one  
31 training session is required for patient/carer administration of pre-prepared medication via  
32 an elastomeric home infusion device which only needs to be connected to and disconnected  
33 from the PICC line correctly. The patient is discharged with the necessary consumables (e.g.  
34 a leaflet of instructions, syringes, needles, 70% alcohol wipes, 0.9% sodium chloride  
35 ampoules, sharps bin, vials with medication powder for infusion, etc.) and is given a contact  
36 number related to the OPAT service for use if any problems occur out of hours. On the  
37 occasion where an elastomeric pump is used for self-administration, these are commercially  
38 pre-filled devices due to safety issues regarding the process of reconstituting drugs into  
39 elastomeric devices outside of an aseptic unit and the associated reduction in shelf life  
40 (approximately 24 hours). A continuous intravenous infusion (CIVI) model of service delivery  
41 in OPAT involves reconstitution of drugs into elastomeric devices by hospital staff with  
42 piperacillin with tazobactam or flucloxacillin on the same day of administration with the  
43 patient visiting clinic once daily.<sup>9 10</sup>  
44  
45  
46  
47  
48  
49  
50  
51  
52  
53  
54  
55  
56  
57  
58  
59  
60



1  
2  
3 Patients referred to OPAT with bone and joint infections (e.g. diabetic foot and orthopaedic  
4 infections) are increasingly considered for suitability for discharge on supervised complex  
5 oral therapies as an alternative to “traditional” OPAT IV therapy. Suitable patients may be  
6 commenced directly onto supervised oral antimicrobial treatment which frequently requires  
7 enhanced monitoring due to potentially serious adverse events (e.g. linezolid or  
8 combination oral antibiotic regimens).<sup>5</sup>  
9  
10  
11  
12  
13  
14  
15  
16

17 In all OPAT models where treatment is required for > 1 week patients will also attend the  
18 OPAT clinic once weekly as a minimum and management/progress will be reviewed via a  
19 weekly virtual multi-disciplinary meeting.<sup>2</sup>  
20  
21  
22  
23  
24  
25  
26

### 27 **Antimicrobials**

28 Antimicrobial medications with a lower frequency of administration compared with  
29 inpatient care are primarily selected for use in OPAT. In the analysis, the type and  
30 distribution of antimicrobial medicines are based on clinical expert opinion and the most  
31 prevalent agents used within the NORS database (Table S3).  
32  
33  
34  
35

36 Antimicrobial medicines which require more than once daily administration (e.g. piperacillin  
37 with tazobactam, flucloxacillin, temocillin, ceftazidime and meropenem) would be primarily  
38 administered by the patient or carer. However, if an antibiotic is stable to degradation in the  
39 outpatient setting (piperacillin with tazobactam and flucloxacillin), patients may receive the  
40 antibiotic via a 24-hour continuous infusion (CIVI) via an elastomeric device as an outpatient  
41 requiring once daily attendance. All other antimicrobial medicines where data on stability  
42 are either not available or are not compatible with 24-hour infusion may be administered  
43 with bolus IV or 30 minute IV infusion.  
44  
45  
46  
47  
48  
49  
50

### 51 **Re-hospitalization**

52 The cost-minimisation model assumed hospital re-admission to occur in 6.4% of treatment  
53 episodes in OPAT.<sup>7</sup> Re-hospitalised patients were assumed to only spend 50% of the  
54 duration of their treatment episode in OPAT.  
55  
56  
57  
58  
59  
60

## Costs

Costs considered in the analysis included specialist staff time (specialist nurses, infectious diseases consultant, and specialist antimicrobial/ clinical pharmacist), antimicrobial medications, elastomeric infusion devices (empty or commercially pre-filled), consumables, laboratory tests and the cost of travel to and from the OPAT clinic where necessary (Tables S4-6). Additionally, costs of re-hospitalisation for patients in OPAT have been included. A daily “overhead” cost per patient to account for administration and support costs of using a healthcare service consistent with published literature has also been assumed in the analysis.<sup>8</sup>

Costs were obtained from various sources. These included the Personal and Social Services Research Unit (PSSRU)<sup>11</sup>, British National Formulary (BNF)<sup>12</sup>, drugs and pharmaceutical electronic market information tool (eMIT)<sup>13</sup>, National Procurement Scotland, Information Services Division (ISD) Scotland cost book<sup>14</sup> and NHS England reference costs<sup>15</sup>.

An appropriate healthcare resource group (HRG) code<sup>15</sup> was identified for each diagnosis to account for costs of inpatient care (Table S7). Costs were based on a weighted average of excess bed day costs as elective and non-elective inpatient stay across various severity levels. No potential additional hospital costs were included.

## RESULTS

Base case results from the cost-minimisation analysis are presented as estimated average cost per treatment episode in inpatient care and models of OPAT healthcare delivery, as well as cost of OPAT as a percentage of the estimated cost of inpatient stay (Tables 2 and 3)

### ***Infections requiring short-term treatment***

#### *Skin and soft tissue infections (SSTI)*

In the cost-minimisation analysis, patients attending once daily for the duration of antimicrobial treatment, were primarily treated with IV ceftriaxone, but also with teicoplanin and daptomycin (for betalactam allergy). Treatment with the same medicines was assumed in the specialist nurse visit model. A small number of patients could also be treated with dalbavancin 1g as a one-off dose, consistent with clinical practice for patients

1  
2  
3 unable to attend for daily treatment. Patients who were offered an elastomeric home  
4 infusion device were primarily treated with ceftriaxone once daily and less often with  
5 flucloxacillin as 24h (CIVI). Dependant on the OPAT service delivery model, the cost of  
6  
7 treating patients with SSTI was estimated in the range of 25%-51% of the cost of inpatient  
8  
9 stay for the equivalent duration of treatment.  
10  
11

### 12 13 *Complex urinary tract infections (UTI)*

14  
15 In the analysis, patients were primarily treated with ertapenem (90%) and a minority of  
16 patients were treated with temocillin. It was assumed that patients attending daily or  
17 treated by a nurse at home were only given ertapenem due to twice daily dosing of  
18 temocillin. Both antibiotics can be self-administered using either short infusion or IV bolus  
19 respectively. No patients were assumed to be treated using home infusion elastomeric  
20 devices. Dependant on the OPAT service delivery model, the cost of treating patients with  
21 complex UTI was estimated in the range of 34%-46% of the cost of inpatient stay for the  
22 equivalent duration of treatment.  
23  
24  
25  
26  
27  
28  
29  
30

### 31 32 ***Infections requiring longer-term treatment***

#### 33 34 *Orthopaedic infections*

35  
36 Patients with orthopaedic infections were assumed to be treated once daily with  
37 ceftriaxone, teicoplanin or ertapenem in the outpatient visit, nurse home visit and self-  
38 administration ( ) OPAT service delivery models. Ceftriaxone was the only antimicrobial used  
39 for self-administration via commercially pre-filled elastomeric device. An analysis is also  
40 presented where patients were treated with oral therapies only or assuming IV to oral  
41 switch at different time points during supervised outpatient therapy. Dependant on the  
42 OPAT service delivery model (excluding oral therapies), the cost of treating patients with  
43 orthopaedic infections was estimated in the range of 22%-41% of the cost of inpatient stay  
44 for the equivalent duration of treatment. Additionally, a movement in treatment practice  
45 from IV to oral antibiotics could results in treatment cost of 13% to 24% of the cost of  
46 inpatient stay, dependent on how early a patient is switched to oral therapy.  
47  
48  
49  
50  
51  
52  
53  
54  
55  
56  
57

#### 58 59 *Diabetic foot infections*

1  
2  
3 Similarly to orthopaedic infections, patients with diabetic foot infections were assumed to  
4 be treated with ceftriaxone, ertapenem and teicoplanin, although the proportion of patients  
5 treated with each agent varied. All antimicrobial medicines are suitable for once daily  
6 administrations. The cost of treatment in OPAT was estimated in the range of 22%-42% of  
7 the cost of inpatient stay for the equivalent duration of treatment. Additionally, a  
8 movement in treatment practice from IV to oral antibiotics could result in treatment cost of  
9 13% to 26% of the cost of inpatient stay, dependent on how early a patient is switched to  
10 oral therapy.  
11  
12  
13  
14  
15  
16  
17  
18

### 19 *Bronchiectasis*

20  
21 In the analysis, patients were assumed to be treated with either ceftazidime, meropenem or  
22 piperacillin with tazobactam. All medications are suitable for IV self-administration with  
23 either a bolus or 30 minute infusion. Only piperacillin with tazobactam was assumed to be  
24 administered with an elastomeric device via 24 hour continuous infusion in an outpatient  
25 setting (CIVI). The per-episode estimated cost for the same treatment plan with a visiting  
26 nurse is also presented. Since all of these medications require more than once daily  
27 administration or continuous daily administration, the general outpatient daily visits and  
28 nurse home visits OPAT service models are highly unlikely to be used in clinical practice so  
29 the results from CIVI models are presented instead. The estimated per treatment episode  
30 cost is in the range of 40%-56% of the cost of inpatient stay and varies with selected OPAT  
31 model of care.  
32  
33  
34  
35  
36  
37  
38  
39  
40  
41  
42

### 43 *Intra-abdominal infections*

44  
45 In the cost-minimisation analysis, patients were primarily treated with ertapenem or  
46 piperacillin with tazobactam. The latter was assumed to be used only in patients who were  
47 suitable for self-administration or attend daily for change of elastomeric device (CIVI).  
48 Patients who visit daily for IV infusions or receive nurse visits were assumed to only be  
49 treated with ertapenem. The estimated per treatment episode cost is in the range of 25%-  
50 42% of the cost of inpatient stay and varies with selected OPAT model of care.  
51  
52  
53  
54  
55  
56  
57  
58  
59  
60

1  
2  
3  
4  
5  
6  
7  
8  
9  
10  
11  
12  
13  
14  
15  
16  
17  
18  
19  
20  
21  
22  
23  
24  
25  
26  
27  
28  
29  
30  
31  
32  
33  
34  
35  
36  
37  
38  
39  
40  
41  
42  
43  
44  
45  
46  
47  
48  
49  
50  
51  
52  
53  
54  
55  
56  
57  
58  
59  
60

For peer review only

**Table 2 Base case results – intravenous infusions**

| Condition                                       | Cost per treatment episode |     |             |     |                             |     |               |     |                |     |                 |     |
|-------------------------------------------------|----------------------------|-----|-------------|-----|-----------------------------|-----|---------------|-----|----------------|-----|-----------------|-----|
|                                                 | SSTI                       |     | Complex UTI |     | Orthopaedic -Bone and joint |     | Diabetic foot |     | Bronchiectasis |     | Intra-abdominal |     |
| Model of care                                   |                            |     |             |     |                             |     |               |     |                |     |                 |     |
| Inpatient stay                                  | £2,476                     | -   | £2,104      | -   | £8,279                      | -   | £8,428        | -   | £3,269         | -   | £7,124          | -   |
| OPAT - once daily visits                        | £631                       | 25% | £758        | 36% | £2,506                      | 30% | £2,671        | 32% | -              | -   | £2,312          | 32% |
| OPAT - specialist nurse daily home visit        | £831                       | 34% | £977        | 46% | £3,375                      | 41% | £3,556        | 42% | £1,839         | 56% | £3,006          | 42% |
| OPAT - self-administration - IV bolus           | £566                       | 23% | £720        | 34% | £1,855                      | 22% | £2,006        | 24% | £1,301         | 40% | £1,811          | 25% |
| OPAT - self-administration - elastomeric device | £611                       | 25% | -           | -   | £2,394                      | 29% | £2,433        | 29% | £1,588         | 49% | £2,952          | 41% |
| OPAT - elastomeric device (CIVI; outpatient)    | £802                       | 32% | -           | -   | -                           | -   | -             | -   | £1,495         | 46% | £2,807          | 39% |
| OPAT - once-off dalbavancin (1g)                | £1,266                     | 51% | -           | -   | -                           | -   | -             | -   | -              | -   | -               | -   |

SSTI, skin and soft tissue infections, UTI, urinary tract infections; OPAT, outpatient parenteral antimicrobial therapy; IV, intravenous; CIVI, continuous intravenous infusion;

**Table 3 Base case results – oral antimicrobials for orthopaedic and diabetic foot infections**

| Condition               | Orthopaedic/ Bone and joint |     | Diabetic foot |     |
|-------------------------|-----------------------------|-----|---------------|-----|
| Model of care           |                             |     |               |     |
| Inpatient stay          | £8,279                      |     | £8,428        |     |
| OPAT - Oral 100%        | £1,114                      | 13% | £1,089        | 13% |
| OPAT - Oral 25%; 75% IV | £2,009                      | 24% | £2,161        | 26% |
| OPAT - Oral 50%; 50% IV | £1,710                      | 21% | £1,816        | 22% |
| OPAT - Oral 75%; 25% IV | £1,410                      | 17% | £1,470        | 17% |

OPAT, outpatient parenteral antimicrobial therapies; IV, intravenous;

## Scenario analyses

In scenario analyses described in table 4, certain modelling assumptions were challenged to assess impact on results in the outpatient setting model. Detailed scenario analysis results are provided in supplementary table 8.

**Table 4 Scenarios: OPAT outpatient vs inpatient stay**

|                                      | Scenario                                                                                                 | Base case                                                                                                 |
|--------------------------------------|----------------------------------------------------------------------------------------------------------|-----------------------------------------------------------------------------------------------------------|
| 0                                    | Base case (outpatient)                                                                                   |                                                                                                           |
| 1                                    | Using cost of inpatient care in infectious disease unit (ISD Scotland) <sup>14</sup>                     | Using condition-specific healthcare resource group (HRG) costs <sup>15</sup>                              |
| 2                                    | Using ISD Scotland <sup>14</sup> cost for outpatient appointments and inpatient stay (IDU)               | Using micro-costing of nurse and consultant outpatient appointments                                       |
| 3                                    | Assuming overheads are 44.8% of total costs consistent with a published source <sup>16</sup>             | Assuming per day cost of using healthcare services consistent with a published source <sup>8</sup>        |
| 4                                    | Using BNF <sup>12</sup> as a source for the cost of linezolid (orthopaedic and diabetic foot infections) | Using eMIT <sup>13</sup> as a source for the cost of linezolid (orthopaedic and diabetic foot infections) |
| Skin and soft tissue infections only |                                                                                                          |                                                                                                           |
| 5                                    | Including the cost of consultant time                                                                    | Nurse-led condition; no consultant time                                                                   |
| 6                                    | Using the licensed dose of dalbavancin (1.5g) once off                                                   | Using dalbavancin 1g as a once-off treatment consistent with clinical practice                            |
| 7                                    | Using the licensed dose of dalbavancin 1g followed by 0.5g                                               | Using dalbavancin 1g as a once-off treatment consistent with clinical practice                            |

ISD, information services division; IDU, infectious disease unit; BNF, British National Formulary; eMIT, electronic market information tool;

Results from scenarios 1 and 2 (costs ranging between 21% and 34% of inpatient costs) are consistent, although lower than base case (25%-44%) across all infection categories due to the higher cost per bed day generally associated with an infectious disease unit.

Given the modelling approach, one of the uncertainties comes from the extent of model-specific per-patient overhead costs (scenario 3). The uncertainty is especially relevant to the outpatient clinic model. One study<sup>16</sup> reported overall overhead and support costs in the outpatient department of their infectious disease unit (IDU) to be 44.8% of total costs excluding re-hospitalization. When the equivalent assumption was made in the outpatient clinic model, the cost of treatment episode in OPAT did not increase over 52% of the cost of

1  
2  
3 inpatient stay, except for bronchiectasis (77%) which is treated with continuous intravenous  
4 infusion with elastomeric device as an outpatient visit once daily in the analysis which is  
5 generally associated with higher cost.  
6  
7

8  
9 There are uncertainties around the source of cost for linezolid for the oral treatment of  
10 orthopaedic and diabetic foot infections (scenario 4). The cost reported in the British  
11 National Formulary<sup>12</sup> is substantially higher than what clinicians have advised and also  
12 reported in the electronic market information tool (eMIT)<sup>13</sup> which has been used in the base  
13 case analysis. Using the higher cost of linezolid results in the cost of oral therapies  
14 increasing from 13% to 21% of the cost of inpatient stay.  
15  
16  
17  
18  
19

20  
21 Additionally, variations in the treatment protocol with dalbavancin seems to have the  
22 highest impact on costs of treatment of skin and soft tissue infections in OPAT due to the  
23 high medicine acquisition cost (scenarios 6 and 7). Treatment with dalbavancin can be as  
24 costly as 74-76% of the cost of inpatient stay.  
25  
26  
27  
28  
29  
30  
31

## 32 **DISCUSSION**

33  
34 Although OPAT has been developing in the UK over the last 25 years, and despite the clinical  
35 benefits of avoiding hospitalisation and keeping care closer to home, there remains wide  
36 variation in OPAT availability and inconsistency in funding/commissioning of services in the  
37 UK. It is possible that OPAT may be perceived as an additional healthcare cost and this could  
38 be a significant barrier to more systematic support for service development. This study  
39 therefore set out to systematically detail OPAT costs and compare with inpatient costs for  
40 key OPAT-treated conditions. To our knowledge, a detailed costing of various OPAT  
41 healthcare delivery models in a UK setting has not been published before. Nevertheless,  
42 results are consistent with previous studies where overall cost of OPAT have been reported  
43 and/or compared with the cost of inpatient care.<sup>6 16-18</sup> Key findings are that the self (or  
44 care)-administration model of care was associated with the lowest cost and nurse home  
45 visits generally had the highest estimated cost per treatment episode across all conditions  
46 evaluated. From all available OPAT models for patients with skin and soft tissue infections,  
47 treatment with a single dose of dalbavancin was estimated to have the highest cost.  
48  
49  
50  
51  
52  
53  
54  
55  
56  
57  
58  
59  
60



1  
2  
3 However, only a small proportion of patients (an estimated 5%) are expected to be treated  
4 with dalbavancin in clinical practice. As expected, oral therapies were the lowest cost  
5 treatment option for patients with orthopaedic (bone and joint) or diabetic foot infection. If  
6 patients are switched from IV as outpatient to oral therapies at least half way through their  
7 treatment duration, the results show the cost of treatment episode to be lower than the  
8 cost of self-administering IV antimicrobials for the whole treatment duration.  
9  
10  
11  
12  
13  
14

15 The cost-minimisation analysis found all OPAT service delivery models to be consistently  
16 associated with lower cost than inpatient stay of equivalent duration across a range of  
17 conditions in the UK NHS. The analysis shows the potential of OPAT to provide quality health  
18 care for suitable patients in an outpatient setting at a fraction of the cost of inpatient care.  
19 When the 4 most frequently used OPAT models of care (outpatient clinic, nurse home visit  
20 self (carer)-administration (bolus IV or elastomeric device) are considered individually, using  
21 NORS UK data<sup>3</sup>, the 5-year estimated savings to the UK National Health Service (NHS)  
22 associated with treatment in OPAT was found to be in the range of £60-77 million (Table  
23 S9). It should be noted that these data only relate to 57 OPAT services and many have not  
24 contributed data consistently for all 5 years (data not shown). The estimated cost savings to  
25 the NHS through systematic roll out of OPAT therefore is likely to be considerably higher.  
26  
27  
28  
29  
30  
31  
32  
33  
34  
35

36 Strengths of the presented analysis include a bottom-up costing approach applied across a  
37 range of infections, and healthcare delivery models in OPAT using UK-specific registry data.  
38 Furthermore, each of these estimated costs were compared against the cost of inpatient  
39 care in a UK setting and a comprehensive list of scenario analyses showed consistency with  
40 base case findings. However, the study also had some limitations. The assumption of  
41 equivalence in patient and treatment outcomes for OPAT and inpatient care as well as  
42 among various models of care in OPAT is based on published systematic reviews<sup>6-8</sup> but  
43 direct comparative evidence is lacking. Furthermore, there was one study<sup>8</sup> to suggest that a  
44 specialist nurse visit model is generally associated with better outcomes compared with  
45 other healthcare delivery models in OPAT. A published source was used for the cost of  
46 inpatient stay which is inconsistent with the bottom-up costing approach undertaken for the  
47 cost of OPAT.<sup>15</sup> The assumption of cost of bed day in the analysis to be equivalent to the  
48 cost of excess bed days, as reported in NHS England Reference costs<sup>15</sup>, is also associated  
49 with uncertainties due to the structure of the reimbursement system in NHS England (e.g.  
50  
51  
52  
53  
54  
55  
56  
57  
58  
59  
60

1  
2  
3 the presence of trim points). Nevertheless, this is considered to be the most suitable  
4 published source of costs of inpatient stay as it provides cost estimates for each of the six  
5 infection categories in the analysis. Lastly, the estimated average costs per treatment  
6 episode in OPAT aim to reflect existing OPAT services and thus set-up and implementation  
7 costs have not been included.  
8  
9  
10  
11  
12

13 It is important to note that most OPAT services will not rely on one particular delivery model  
14 and that individual patient factors such as, ability to self-administer or to attend the OPAT  
15 clinic, and choice of antimicrobial, will be the major determinants of the delivery model  
16 used. The data presented necessarily incorporate multiple variables to allow for variation  
17 based on patient need.  
18  
19  
20  
21  
22

23 OPAT is primarily about delivering high quality patient centered care closer to home whilst  
24 avoiding inherent risks associated with hospitalisation. These positive health economic  
25 findings should be utilised by OPAT clinician/practitioners, healthcare managers and policy  
26 makers alongside the already powerful clinical effectiveness and patient safety data to drive  
27 further OPAT development in the UK.  
28  
29  
30  
31  
32

33 **Acknowledgments:** This study was initiated on behalf of the British Society of Antimicrobial Chemotherapy UK  
34 OPAT initiative in conjunction with the Scottish Antimicrobial Prescribing group and is part of a broader OPAT  
35 health technology assessment performed by the Scottish Health Technology Group, Healthcare Improvement  
36 Scotland. Specific thanks to: Dr Felicity Drummond for access to and summary data from the National UK OPAT  
37 Registry and to the 57 UK OPAT services who have contributed to the NORS database; Healthcare  
38 Improvement Scotland: Jenny Harbour for summarizing relevant clinical evidence, Dr Carolyn Sleith for  
39 undertaking a literature search, Meryl Heggeland for checking to validity of the economic methods and results,  
40 Edward Clifton for general support with the project; for providing clinical advice: from NHS Lothian: Dr Claire  
41 Mackintosh and Sharon Watson; from NHS Tayside: Dr Busi Mooka, Dr Jorge Rojas Marcos and Gain Menzies;  
42 from NHS Fife: Dr David Griffith.  
43  
44  
45  
46  
47  
48

49 **Contributors:** MD: responsible for developing the economic model, completing the health economic analysis  
50 and preparation of the manuscript; RAS and MG: responsible for conceiving the concept of the study, advising  
51 on the development of the economic model and preparation of the manuscript. All authors have approved the  
52 final version of the manuscript.  
53  
54

55 **Funding:** This research received no specific grant from any funding agency in the public, commercial or not-for-  
56 profit sectors.

57 **Competing interests:** RAS and MG are co-leads of the BSAC UK OPAT initiative. RAS is the chair of the Scottish  
58 Antimicrobial Prescribing Group  
59  
60

1  
2  
3 **Patient consent for publication:** Not required

4 **Ethics approval:** Not required

5  
6 **Data sharing statement:** All data relevant to the study are included in the article or uploaded as  
7 supplementary information.  
8  
9

10  
11  
12  
13  
14  
15  
16  
17  
18  
19  
20  
21  
22  
23 **REFERENCES**

- 24  
25  
26 1. Chapman ALN. Outpatient parenteral antimicrobial therapy. *BMJ* 2013;346:f1585.  
27 2. Chapman ALN, Patel S, Horner C, et al. Updated good practice recommendations for  
28 outpatient parenteral antimicrobial therapy (OPAT) in adults and children in the UK. *JAC -*  
29 *Antimicrobial Resistance* 2019;1(2)  
30 3. British Society for Antimicrobial Chemotherapy. National Outcomes Registry System  
31 (NORS) c2019 [2020 Oct 26]. Available from: <https://www.e-opat.com/opat-registry/>.  
32 4. Jones GR, Cumming DV, Honeywell G, et al. How is income generated by outpatient  
33 parenteral antibiotic treatment (OPAT) in the UK? Analysis of payment tariffs for cellulitis.  
34 *Journal of Antimicrobial Chemotherapy* 2015;70(4):1236-40.  
35 5. Seaton RA, Ritchie ND, Robb F, et al. From 'OPAT' to 'COpAT': implications of the OVIVA  
36 study for ambulatory management of bone and joint infection. *J Antimicrob Chemother*  
37 2019;74:2119-21.  
38 6. Mitchell ED, Czoski Murray C, Meads D, et al. Clinical and cost-effectiveness, safety and  
39 acceptability of community intravenous antibiotic service models: CIVAS systematic review.  
40 *BMJ Open* 2017;7(4):e013560. doi: 10.1136/bmjopen-2016-013560 [published Online First:  
41 2017/04/22]  
42 7. Sriskandarajah S, Hobbs J, Roughead E, et al. Safety and effectiveness of 'hospital in the  
43 home' and 'outpatient parenteral antimicrobial therapy' in different age groups: A  
44 systematic review of observational studies. *Int J Clin Pract* 2018:e13216. doi:  
45 10.1111/ijcp.13216 [published Online First: 2018/06/20]  
46 8. Minton J, Murray CC, Meads D, et al. The Community IntraVenous Antibiotic Study  
47 (CIVAS): a mixed-methods evaluation of patient preferences for and cost-effectiveness of  
48 different service models for delivering outpatient parenteral antimicrobial therapy. *NIHR*  
49 *Journals Library Health Services and Delivery Research* 2017;02:02.  
50 9. Allwood MC, Stonkute D, Wallace A, et al. Assessment of the stability of citrate-buffered  
51 flucloxacillin for injection when stored in two commercially available ambulatory elastomeric  
52 devices: INFusor LV (Baxter) and Accufuser (Woo Young Medical): a study compliant with the  
53 NHS Yellow Cover Document (YCD) requirements. *Eur J Hosp Pharm* 2018;27(2):90-4.  
54 10. Jamieson C, Ozolina L, Seaton RA, et al. Assessment of the stability of citrate-buffered  
55 piperacillin/tazobactam for continuous infusion when stored in two commercially available  
56  
57  
58  
59  
60

- 1  
2  
3 elastomeric devices for outpatient parenteral antimicrobial chemotherapy: a study  
4 compliant with the NHS Yellow Cover Document requirements. *Eur J Hosp Pharm* 2020  
5 11. PSSRU. Unit costs of health and social care 2020 [2020 October 28]. Available from:  
6 <https://www.pssru.ac.uk/project-pages/unit-costs/>.  
7  
8 12. BNF: British national formulary 2020 [2020 October 28]. Available from:  
9 <https://bnf.nice.org.uk>.  
10  
11 13. Department of Health. Drugs and pharmaceutical electronic market information tool  
12 (eMIT) 2020 [2020 October 28]. Available from:  
13 [https://www.gov.uk/government/publications/drugs-and-pharmaceutical-electronic-](https://www.gov.uk/government/publications/drugs-and-pharmaceutical-electronic-market-information-emit#:~:text=National%20Health%20Service-,Drugs%20and%20pharmaceutical%20electronic%20market%20information%20tool%20(eMIT),generic%20drugs%20and%20pharmaceutical%20products)  
14 [market-information-emit#:~:text=National%20Health%20Service-](https://www.gov.uk/government/publications/drugs-and-pharmaceutical-electronic-market-information-emit#:~:text=National%20Health%20Service-,Drugs%20and%20pharmaceutical%20electronic%20market%20information%20tool%20(eMIT),generic%20drugs%20and%20pharmaceutical%20products)  
15 [,Drugs%20and%20pharmaceutical%20electronic%20market%20information%20tool%20\(eM](https://www.gov.uk/government/publications/drugs-and-pharmaceutical-electronic-market-information-emit#:~:text=National%20Health%20Service-,Drugs%20and%20pharmaceutical%20electronic%20market%20information%20tool%20(eMIT),generic%20drugs%20and%20pharmaceutical%20products)  
16 [IT\),generic%20drugs%20and%20pharmaceutical%20products](https://www.gov.uk/government/publications/drugs-and-pharmaceutical-electronic-market-information-emit#:~:text=National%20Health%20Service-,Drugs%20and%20pharmaceutical%20electronic%20market%20information%20tool%20(eMIT),generic%20drugs%20and%20pharmaceutical%20products).  
17  
18 14. Public Health Scotland. Cost books 2018/19 2019 [2020 October 28]. Available from:  
19 <https://www.isdscotland.org/Health-Topics/Finance/Costs/Detailed-Tables/>.  
20  
21 15. NHS Digital. Reference costs: 2019-20 reference costs collection 2020 [2020 October 28].  
22 Available from: [https://digital.nhs.uk/data-and-information/data-collections-and-data-](https://digital.nhs.uk/data-and-information/data-collections-and-data-sets/data-collections/reference-costs)  
23 [sets/data-collections/reference-costs](https://digital.nhs.uk/data-and-information/data-collections-and-data-sets/data-collections/reference-costs).  
24  
25 16. Chapman ALN, Dixon S, Andrews D, et al. Clinical efficacy and cost-effectiveness of  
26 outpatient parenteral antibiotic therapy (OPAT): a UK perspective. *J Antimicrob Chemother*  
27 2009;64:1316-24.  
28  
29 17. Durojaiye OC, Bell H, Andrews D, et al. Clinical efficacy, cost analysis and patient  
30 acceptability of outpatient parenteral antibiotic therapy (OPAT): a decade of Sheffield (UK)  
31 OPAT service. *International Journal of Antimicrobial Agents* 2018;51(1):26-32.  
32  
33 18. Seaton RA, Johal S, Coia JE, et al. Economic evaluation of treatment for MRSA  
34 complicated skin and soft tissue infections in Glasgow hospitals. *European Journal of Clinical*  
35 *Microbiology & Infectious Diseases* 2014;33(3):305-11.  
36  
37  
38  
39  
40  
41  
42  
43  
44  
45  
46  
47  
48  
49  
50  
51  
52  
53  
54  
55  
56  
57  
58  
59  
60

## Supplementary materials:

Table S1 Costing model assumptions

| No | Assumption                                                                                                                                                                                                                        | Source/Justification                                                                                                                                              |
|----|-----------------------------------------------------------------------------------------------------------------------------------------------------------------------------------------------------------------------------------|-------------------------------------------------------------------------------------------------------------------------------------------------------------------|
| 1  | All patients with long term infections are assessed on admission and upon discharge by a specialist consultant. Patients spend 30 minutes with a specialist consultant and 1h with a nurse at initial and final assessment.       | BSAC good practice recommendations (3.1-3.15); communication with clinical experts in OPAT.                                                                       |
| 2  | Skin and soft tissue infections are a nurse-led condition unless patient is treated with dalbavancin.                                                                                                                             | BSAC good practice recommendations (3.1-3.15); communication with clinical experts in OPAT.                                                                       |
| 3  | All patients with complex UTI are assessed by a consultant once.                                                                                                                                                                  | BSAC good practice recommendations (3.1-3.15); communication with clinical experts in OPAT.                                                                       |
| 4  | All patient are allocated 15 minutes of pharmacist time per treatment episode.                                                                                                                                                    | BSAC good practice recommendations (3.1-3.15); communication with clinical experts in OPAT.                                                                       |
| 5  | Laboratory tests including UE, LFT, FBC, C-reactive protein are done at initial and final assessment and once weekly for longer-term infections. Patients treated with teicoplanin receive weekly teicoplanin levels blood tests. | BSAC good practice recommendations (4.4); personal communication with clinical experts in OPAT.<br><br>Type of tests might vary with the choice of antimicrobial  |
| 6  | All patients requiring longer term treatment (more than 7 days), are assessed weekly at a MDT meeting. This is approx. 5 minutes of consultant, pharmacist and specialist nurse time per patient.                                 | BSAC good practice recommendations (4.2); personal communication with clinical experts in OPAT                                                                    |
| 7  | Each daily visit to outpatient clinic lasts 40 minutes during which a band 6 nurse examines the patient, prepares and administers medication. A nurse visiting patient's home would spend the equivalent amount of time.          | Personal communication with clinical experts in OPAT<br><br>This might be a conservative approach given that some antimicrobials are administered in 2-3 minutes. |
| 8  | Patients with infections requiring longer-term treatment who self-administer, visit the clinic once weekly for a check-up with a nurse and to have blood work done.                                                               | BSAC good practice recommendations (4.3); assumption                                                                                                              |
| 9  | Patients who self-administer with bolus IV receive 3 training sessions with a nurse (50:50 split band 5/band 6), each lasting 1 h. Patients who self-administer with elastomeric device receive 1 training session.               | Personal communication with clinical experts in OPAT.<br>Assumption<br>BSAC good practice recommendations (3.13);                                                 |

|    |                                                                                                                                                                                                                                                                                                                                                                                                                                                                                                        |                                                                                                                                                                                                                                                                                                                                                                                                                                                                                                                                      |
|----|--------------------------------------------------------------------------------------------------------------------------------------------------------------------------------------------------------------------------------------------------------------------------------------------------------------------------------------------------------------------------------------------------------------------------------------------------------------------------------------------------------|--------------------------------------------------------------------------------------------------------------------------------------------------------------------------------------------------------------------------------------------------------------------------------------------------------------------------------------------------------------------------------------------------------------------------------------------------------------------------------------------------------------------------------------|
| 10 | Single-use elastomeric devices administered in an outpatient setting (CIVI) are filled up by hospital staff (approximately 15 minutes of nurse's time).                                                                                                                                                                                                                                                                                                                                                | Assumption; Expert opinion;                                                                                                                                                                                                                                                                                                                                                                                                                                                                                                          |
| 11 | Single-use elastomeric devices used for self-administration are commercially pre-filled.                                                                                                                                                                                                                                                                                                                                                                                                               | Assumption; Expert opinion;                                                                                                                                                                                                                                                                                                                                                                                                                                                                                                          |
| 12 | Consumables: each patient receives 1 PICC line; per administration: 1 apron, 1 pair of gloves, 4 needles, 4 syringes, 1 pre-injection swab, 3 0.9% sodium chloride ampoules;                                                                                                                                                                                                                                                                                                                           | Personal communication with clinical experts in OPAT.<br>Assumption<br>Varies with method of administration                                                                                                                                                                                                                                                                                                                                                                                                                          |
| 13 | A nurse travelling to patients home would spend 33 minutes (non-patient contact time) per journey travelling with an ambulance car (£10.63 per journey). This is approximately 11 miles per journey.                                                                                                                                                                                                                                                                                                   | ISD Cost book for Scotland. This is an approximation due to lack of available data for distances travelled in OPAT. Distance travelled varies with geographic location. Longer distances might be travelled in the Highlands and islands in Scotland. It was assumed that this estimate for Scotland is relevant to UK.                                                                                                                                                                                                              |
| 14 | Type and distribution of medicines for each condition in the analysis are based on clinical expert opinion                                                                                                                                                                                                                                                                                                                                                                                             | NORS data do not link conditions to antimicrobials.                                                                                                                                                                                                                                                                                                                                                                                                                                                                                  |
| 15 | Cost of linezolid comes from eMIT; all other costs of antimicrobials come from the BNF (cheapest tariff)                                                                                                                                                                                                                                                                                                                                                                                               | A generic version of linezolid is used in OPAT but this is not reflected in the BNF. The BNF cost is substantially higher.                                                                                                                                                                                                                                                                                                                                                                                                           |
| 16 | Antimicrobials requiring more than once daily administration (temocillin, ceftazidime, meropenem and piperacillin with tazobactam) are assumed to be self-administered (bolus IV) only.                                                                                                                                                                                                                                                                                                                | More than once daily visit (hospital or nurse home visit) in OPAT are not primarily available options in clinical practice.                                                                                                                                                                                                                                                                                                                                                                                                          |
| 17 | Piperacillin with tazobactam, flucloxacillin and ceftriaxone are administered with commercially pre-filled elastomeric device in the six conditions included in the analysis. Only piperacillin with tazobactam and flucloxacillin can be administered with elastomeric device filled up by hospital staff.                                                                                                                                                                                            | BSAC good practice recommendations (3.12); Clinical expert opinion;                                                                                                                                                                                                                                                                                                                                                                                                                                                                  |
| 18 | For bronchiectasis: patients can travel daily to outpatient clinic for piperacillin with tazobactam (with buffered saline) to be administered as continuous IV with elastomeric device; Although the same model of care with piperacillin with tazobactam is available for the treatment of intra-abdominal infections, for simplicity only ertapenem was assumed to be used if patients attend clinic daily in the outpatient service delivery model. A CIVI as outpatient model is shown separately. | An assumption was made that if a patient attends the OPAT clinic daily or is visited by a nurse, the cheapest treatment option will be used in clinical practice. In the case of treating intra-abdominal infections, ertapenem once daily is cheaper than continuous piperacillin with tazobactam with elastomeric device.<br><br>In patients with bronchiectasis, continuous piperacillin with tazobactam with elastomeric device is the only treatment option in the hospital or nurse daily visits OPAT service delivery models. |

|    |                                                                                                                                    |                                                                                                                                                                                                                                                                                                                                                                                                                                                                                                                                                                                                                                                                                                                                                       |
|----|------------------------------------------------------------------------------------------------------------------------------------|-------------------------------------------------------------------------------------------------------------------------------------------------------------------------------------------------------------------------------------------------------------------------------------------------------------------------------------------------------------------------------------------------------------------------------------------------------------------------------------------------------------------------------------------------------------------------------------------------------------------------------------------------------------------------------------------------------------------------------------------------------|
| 19 | The cost of empty elastomeric devices is based on the average cost of 2 commercially available devices assuming equal market share | BSAC good practice recommendations (3.12); Clinical expert opinion;                                                                                                                                                                                                                                                                                                                                                                                                                                                                                                                                                                                                                                                                                   |
| 20 | A patient would spend the equivalent amount of time in hospital care in absence of OPAT                                            | Clinical expert opinion                                                                                                                                                                                                                                                                                                                                                                                                                                                                                                                                                                                                                                                                                                                               |
| 21 | A patient has a small probability (0.064) to be re-admitted to hospital half-way during their treatment in OPAT                    | Clinical effectiveness data; Clinical expert opinion                                                                                                                                                                                                                                                                                                                                                                                                                                                                                                                                                                                                                                                                                                  |
| 22 | Condition-specific HRG cost per excess bed day in hospital to estimate the cost of inpatient stay                                  | <p>The true cost per day of inpatient stay of patients who are eligible for OPAT is unknown. NHS England reference costs are considered a standard source of cost estimates associated with certain diagnoses or interventions. However, costs are presented as per episode of average treatment duration and cost of excess bed days if treatment goes beyond the expected treatment duration (trim point). Due to lack of better evidence, excess bed day costs were considered the best source of costs of inpatient stay for the purposes of this analysis.</p> <p>Condition-specific costs were selected to allow for granularity. However, costs were similar so assuming the same cost for each condition is also a reasonable assumption.</p> |

BSAC, British Society for Antimicrobial Chemotherapy; OPAT, Outpatient Parenteral Antimicrobial Therapy ; UTI, urinary tract infections ; UE, urea and electrolytes; LFT, liver function test; FBC, full blood count; MDT, multi-disciplinary team; IV, intravenous ;CIVI, continuous intravenous infusion; ISD, information services division; PICC, peripherally inserted central catheter ; HRG, health resource group ;eMIT, electronic market information tool ; BNF, British National Formulary ;

**Table S2 Breakdown of infection categories**

| Infection category                      | Infection included in this category               |
|-----------------------------------------|---------------------------------------------------|
| Skin and soft tissue infections         | Cellulitis                                        |
|                                         | Other skin and soft tissue infections             |
| Orthopaedic infections (bone and joint) | Prosthetic joint infection (knee)                 |
|                                         | Osteomyelitis – native                            |
|                                         | Prosthetic joint infection (hip)                  |
|                                         | Osteomyelitis - surgically related                |
|                                         | Discitis/vertebral osteomyelitis                  |
|                                         | Prosthetic joint infection (other)                |
|                                         | Discitis/vertebral osteomyelitis - device related |
| Diabetic foot infections                | Osteomyelitis - diabetic foot                     |
|                                         | Diabetic foot infection - no osteomyelitis        |

|                                         |                                                                  |
|-----------------------------------------|------------------------------------------------------------------|
| <b>Complex urinary tract infections</b> | Drug resistant lower urinary tract infections and pyelonephritis |
| <b>Bronchiectasis</b>                   | Bronchiectasis                                                   |
|                                         | Other complex respiratory tract infection                        |
| <b>Intra-abdominal infections</b>       | Gastro-intestinal infection                                      |
|                                         | Hepatic abscess                                                  |
|                                         | Pelvic abscess                                                   |

**Table S3 Condition-specific antimicrobials in OPAT**

| <b>Condition</b>                             | <b>Medication</b>            | <b>Distribution</b> |
|----------------------------------------------|------------------------------|---------------------|
| <b>Skin and soft tissue infections (IV)</b>  | Ceftriaxone                  | 75%                 |
|                                              | Teicoplanin                  | 10%                 |
|                                              | Daptomycin                   | 5%                  |
|                                              | Flucloxacillin               | 5%                  |
|                                              | Dalbavancin                  | 5%                  |
| <b>Orthopaedic; Bone-Joint (IV)</b>          | Ceftriaxone                  | 60%                 |
|                                              | Teicoplanin                  | 30%                 |
|                                              | Ertapenem                    | 10%                 |
| <b>Orthopaedic; Bone-Joint (oral)</b>        | Ciprofloxacin/Rifampicin     | 25%                 |
|                                              | Levofloxacin/Rifampicin      | 12.50%              |
|                                              | Co-trimoxazole/Rifampicin    | 12.50%              |
|                                              | Clindamycin/Rifampicin       | 12.50%              |
|                                              | Linezolid/ciprofloxacin      | 12.50%              |
|                                              | Linezolid                    | 25%                 |
| <b>Diabetic foot (IV)</b>                    | Ceftriaxone                  | 45%                 |
|                                              | Teicoplanin                  | 10%                 |
|                                              | Ertapenem                    | 45%                 |
| <b>Diabetic foot (oral)</b>                  | Clindamycin/Doxycycline      | 25%                 |
|                                              | Clindamycin/Co-trimoxazole   | 12.50%              |
|                                              | Clindamycin/Ciprofloxacin    | 12.50%              |
|                                              | Linezolid/ciprofloxacin      | 12.50%              |
|                                              | Ciprofloxacin/Doxycycline    | 25.00%              |
|                                              | Levofloxacin/Doxycycline     | 12.50%              |
| <b>Complex urinary tract infections (IV)</b> | Ertapenem                    | 90%                 |
|                                              | Temocillin                   | 10%                 |
| <b>Bronchiectasis (IV)</b>                   | Ceftazidime                  | 70%                 |
|                                              | Piperacillin with tazobactam | 15%                 |
|                                              | Meropenem                    | 15%                 |
| <b>Intra-abdominal (IV)</b>                  | Ertapenem                    | 75%                 |
|                                              | Piperacillin with tazobactam | 25%                 |

IV, intravenous;



**Table S4 Unit costs of resources used in OPAT services**

| Item                                                                                       | Unit cost | Notes                                                                             | Source               |
|--------------------------------------------------------------------------------------------|-----------|-----------------------------------------------------------------------------------|----------------------|
| Medical consultant                                                                         | £109      | Per working hour                                                                  | PSSRU,2019           |
| Pharmacist band 8a                                                                         | £67       | Per working hour                                                                  | PSSRU,2019           |
| Nurse band 6                                                                               | £47       | Per working hour                                                                  | PSSRU,2019           |
| Nurse band 5                                                                               | £38       | Per working hour                                                                  | PSSRU,2019           |
| Antimicrobial medicine (IV)                                                                | Variable* | Condition-specific                                                                | BNF,2020, eMIT, 2020 |
| Antimicrobial medicine (oral)                                                              | Variable* | Condition-specific                                                                | BNF,2020, eMIT, 2020 |
| Laboratory tests                                                                           | £8        | UE,LFT,CRP and FBC                                                                | ISD Cost book,2020   |
| Laboratory tests (specialist)                                                              | £47       | Teicoplanin levels                                                                | Expert               |
| Consumables - PICC line                                                                    | £36       | Per patient                                                                       | National Procurement |
| Consumables - Butterfly needle                                                             | £1        | Per administration                                                                | National Procurement |
| Consumables (other)                                                                        | £1.65     | Single use; apron, needles, syringe, pre-injection swab                           | National Procurement |
| Elastomeric device; empty                                                                  | £31       | Based on equal market share of two devices (single use)                           | National Procurement |
| Elastomeric device; commercially pre-filled (piperacillin with tazobactam; flucloxacillin) | £90       | Per administration                                                                | Expert               |
| Elastomeric device; commercially pre-filled (ceftriaxone)                                  | £45       | Per administration                                                                | Expert               |
| Buffered saline                                                                            | £2        | Per administration                                                                | Expert               |
| Nurse travel                                                                               | £11       | Per journey - based on average travel of 11 miles                                 | ISD Cost book,2020   |
| Patient transport service                                                                  | £42       | Per journey - based on average travel of 11 miles                                 | ISD Cost book,2020   |
| General cost of using healthcare services (inflated)                                       | £13       | Per patient; per day (inflated to 2019 prices using the NHS cost inflation index) | Minton, 2017[3]      |

\*See tables S5 and S6 for costs of antimicrobials in OPAT

UE, urea and electrolytes; LFT, liver function test; CRP, c-reactive protein test; FBC, full blood count; PSSRU, Personal Social Services Research Unit; BNF, British National Formulary; eMIT, electronic market information tool; ISD, Information Services Division

**Table S5 Intravenously administered antimicrobials in OPAT**

| Medicines (IV) - BNF | Dose in OPAT | Frequency of administration | Cost per pack | Source    |
|----------------------|--------------|-----------------------------|---------------|-----------|
| Ceftriaxone          | 2g           | Once daily                  | £19.18        | BNF, 2020 |

|                                 |          |                                           |         |           |
|---------------------------------|----------|-------------------------------------------|---------|-----------|
| Teicoplanin                     | 600mg    | Once daily or 1200mg;<br>3 times per week | £3.93   | BNF, 2020 |
| Daptomycin                      | 700mg    | Once daily                                | £60.00  | BNF, 2020 |
| Flucloxacillin                  | 8g       | 24h infusion                              | £6.00   | BNF, 2020 |
| Dalbavancin                     | 1000 mg  | One-off                                   | £558.70 | BNF, 2020 |
| Ertapenem                       | 1g       | Once daily                                | £31.65  | BNF, 2020 |
| Temocillin                      | 2g       | every 12 h                                | £25.45  | BNF, 2020 |
| Ceftazidime                     | 2g       | 3 times a day                             | £17.59  | BNF, 2020 |
| Piperacillin with<br>tazobactam | 4.5g/18g | 4 times per day/24h<br>infusion           | £76.50  | BNF, 2020 |
| Meropenem                       | 1g       | 0.5-1g every 8 hours                      | £186.70 | BNF, 2020 |

IV, intravenous; BNF, British National Formulary

**Table S6 Oral antimicrobials for the treatment of orthopaedic and diabetic foot infections in OPAT**

| Medicines (oral) | Dose in OPAT | Frequency of administration | Cost per pack | Source    |
|------------------|--------------|-----------------------------|---------------|-----------|
| Ciprofloxacin    | 750mg        | every 12h                   | £8.00         | BNF,2020  |
| Levofloxacin     | 500mg        | every 12h                   | £24.50        | BNF,2020  |
| Co-trimoxazole   | 960mg        | every 12h                   | £23.48        | BNF,2020  |
| Clindamycin      | 600mg        | every 8h                    | £38.23        | BNF,2020  |
| Linezolid        | 600mg        | every 12h                   | £7.48         | eMIT,2020 |
| Linezolid        | 600 mg       | every 12h                   | £327.24       | BNF, 2020 |
| Doxycycline      | 100mg        | every 12h                   | £1.64         | BNF,2020  |
| Rifampicin       | 400mg        | every 12h                   | £123.60       | BNF,2020  |
| Rifampicin       | 50mg         | every 12h                   | £54.69        | BNF,2020  |

BNF, British National Formulary

**Table S7 Condition-specific healthcare resource group (HRG) and bed-day cost of inpatient stay**

| Condition                             | HRG code | Description                                                                                                                  | Cost | Source                                    |
|---------------------------------------|----------|------------------------------------------------------------------------------------------------------------------------------|------|-------------------------------------------|
| SSTI                                  | HD21 D-H | Soft Tissue Disorders with CC Score 0-12+                                                                                    | £387 | NHS<br>England<br>Reference<br>costs,2019 |
| Complex UTI                           | LA04 N-S | Kidney or Urinary Tract Infections, without Interventions, with CC Score 0-13+                                               | £301 |                                           |
| Orthopaedic /Diabetic foot infections | HD25 D-H | Infections of Bones or Joints, with CC Score 13+                                                                             | £298 |                                           |
|                                       | HE81 A-C | Infection or Inflammatory Reaction, due to, Internal Orthopaedic Prosthetic Devices, Implants or Grafts, with CC Score 0-13+ |      |                                           |
| Bronchiectasis                        | DZ23 M-N | Bronchopneumonia without Interventions, with CC Score 0-10                                                                   | £297 |                                           |
| Intra-abdominal                       | FD01 F-J | Gastrointestinal Infections without Interventions, with CC Score 8+                                                          | £321 |                                           |

SSTI, skin and soft tissue infections; UTI, urinary tract infections; NHS, National Health Service;

**Table S8 Scenario Analyses: Results**

| Scenario | SSTI | Complex UTI | Orthopaedic | Diabetic foot | Bronchiectasis | Intra-abdominal |
|----------|------|-------------|-------------|---------------|----------------|-----------------|
|----------|------|-------------|-------------|---------------|----------------|-----------------|

|   |     |     |     |     |     |     |
|---|-----|-----|-----|-----|-----|-----|
| 0 | 25% | 36% | 30% | 32% | 44% | 32% |
| 1 | 21% | 25% | 22% | 22% | 34% | 24% |
| 2 | 20% | 28% | 24% | 24% | 31% | 25% |
| 3 | 33% | 52% | 40% | 44% | 77% | 46% |
| 4 | -   | -   | 21% | 21% | -   | -   |
| 5 | 28% | -   | -   | -   | -   | -   |
| 6 | 74% | -   | -   | -   | -   | -   |
| 7 | 76% | -   | -   | -   | -   | -   |

SSTI, skin and soft tissue infections; UTI, urinary tract infections

**Table S9 Total costs of models of care and savings associated with OPAT across all conditions included within the NORS data set**

| Model of care                                    | Total costs  | Total savings (OPAT) |
|--------------------------------------------------|--------------|----------------------|
| Inpatient stay                                   | £103,070,256 |                      |
| OPAT - once daily visits <sup>1</sup>            | £33,014,148  | £70,056,108          |
| OPAT - nurse home visits                         | £43,333,446  | £59,736,809          |
| OPAT - self-administration (bolus IV)            | £26,421,799  | £76,648,457          |
| OPAT - self-administration (device) <sup>2</sup> | £31,502,516  | £67,578,565          |

<sup>1</sup>bronchiectasis excluded; <sup>2</sup>complex urinary tract infections excluded;  
OPAT, outpatient parenteral antimicrobial therapy, IV, intravenous;

# BMJ Open

## Outpatient parenteral antimicrobial therapy (OPAT) versus inpatient care in the UK: a health economic assessment for six key diagnoses

|                                 |                                                                                                                                                                                                                                                                                                             |
|---------------------------------|-------------------------------------------------------------------------------------------------------------------------------------------------------------------------------------------------------------------------------------------------------------------------------------------------------------|
| Journal:                        | <i>BMJ Open</i>                                                                                                                                                                                                                                                                                             |
| Manuscript ID                   | bmjopen-2021-049733.R1                                                                                                                                                                                                                                                                                      |
| Article Type:                   | Original research                                                                                                                                                                                                                                                                                           |
| Date Submitted by the Author:   | 29-Aug-2021                                                                                                                                                                                                                                                                                                 |
| Complete List of Authors:       | Dimitrova, Maria; Healthcare Improvement Scotland, Scottish Health Technology Group<br>Gilchrist, Mark; Imperial College Healthcare NHS Trust<br>Seaton, R. A.; Queen Elizabeth University Hospital, Infectious diseases; Healthcare Improvement Scotland Glasgow, Scottish Antimicrobial Prescribing Group |
| <b>Primary Subject Heading</b>: | Health economics                                                                                                                                                                                                                                                                                            |
| Secondary Subject Heading:      | Infectious diseases, Health services research                                                                                                                                                                                                                                                               |
| Keywords:                       | INFECTIOUS DISEASES, HEALTH ECONOMICS, Organisation of health services < HEALTH SERVICES ADMINISTRATION & MANAGEMENT, HEALTH SERVICES ADMINISTRATION & MANAGEMENT, Quality in health care < HEALTH SERVICES ADMINISTRATION & MANAGEMENT                                                                     |
|                                 |                                                                                                                                                                                                                                                                                                             |

SCHOLARONE™  
Manuscripts



I, the Submitting Author has the right to grant and does grant on behalf of all authors of the Work (as defined in the below author licence), an exclusive licence and/or a non-exclusive licence for contributions from authors who are: i) UK Crown employees; ii) where BMJ has agreed a CC-BY licence shall apply, and/or iii) in accordance with the terms applicable for US Federal Government officers or employees acting as part of their official duties; on a worldwide, perpetual, irrevocable, royalty-free basis to BMJ Publishing Group Ltd ("BMJ") its licensees and where the relevant Journal is co-owned by BMJ to the co-owners of the Journal, to publish the Work in this journal and any other BMJ products and to exploit all rights, as set out in our [licence](#).

The Submitting Author accepts and understands that any supply made under these terms is made by BMJ to the Submitting Author unless you are acting as an employee on behalf of your employer or a postgraduate student of an affiliated institution which is paying any applicable article publishing charge ("APC") for Open Access articles. Where the Submitting Author wishes to make the Work available on an Open Access basis (and intends to pay the relevant APC), the terms of reuse of such Open Access shall be governed by a Creative Commons licence – details of these licences and which [Creative Commons](#) licence will apply to this Work are set out in our licence referred to above.

Other than as permitted in any relevant BMJ Author's Self Archiving Policies, I confirm this Work has not been accepted for publication elsewhere, is not being considered for publication elsewhere and does not duplicate material already published. I confirm all authors consent to publication of this Work and authorise the granting of this licence.

1  
2  
3  
4  
5  
6  
7  
8  
9  
10  
11  
12  
13  
14  
15  
16  
17  
18  
19  
20  
21  
22  
23  
24  
25  
26  
27  
28  
29  
30  
31  
32  
33  
34  
35  
36  
37  
38  
39  
40  
41  
42  
43  
44  
45  
46  
47  
48  
49  
50  
51  
52  
53  
54  
55  
56  
57  
58  
59  
60

## Outpatient parenteral antimicrobial therapy (OPAT) versus inpatient care in the UK: a health economic assessment for six key diagnoses

Maria Dimitrova<sup>1</sup>, Mark Gilchrist<sup>2</sup> R Andrew Seaton<sup>3, 4</sup>

1. Healthcare Improvement Scotland, Scottish Health Technology Group, Edinburgh
2. Department of Infection / Pharmacy, Imperial College Healthcare NHS Trust, London
3. Infection unit, Queen Elizabeth University Hospital, NHS Greater Glasgow and Clyde, Glasgow
4. Healthcare Improvement Scotland, Scottish Antimicrobial Prescribing Group, Glasgow

Correspondence to: Dr R Andrew Seaton, Consultant in Infectious diseases, Queen Elizabeth University Hospital, 1345 Govan Road, Glasgow, G514TF  
Email: [andrew.seaton@ggc.scot.nhs.uk](mailto:andrew.seaton@ggc.scot.nhs.uk)

## Abstract:

**Objectives** To compare costs associated with different models of outpatient parenteral antimicrobial therapy (OPAT) delivery with costs of inpatient (IP) care across key infection groups managed via OPAT in the UK.

**Design** A cost-minimisation design was used due to evidence of similarities in patient and treatment outcomes between OPAT and IP care. A bottom-up approach was undertaken for the evaluation of OPAT associated costs. The British Society of Antimicrobial Chemotherapy (BSAC) National Outcomes Registry System was used to determine key infection diagnoses, mean duration of treatment and most frequent antibiotics used.

**Setting** Several OPAT delivery settings were considered and compared with IP care.

**Interventions** OPAT models considered were OP clinic model, nurse home visits, self (or carer)-administration by a bolus IV, self-administration by a commercially pre-filled elastomeric device, continuous intravenous infusion of piperacillin with tazobactam or flucloxacillin with elastomeric device as OP once daily and, specifically for bone and joint and diabetic foot infections, complex outpatient oral antibiotic therapies.

**Results** Base case and a range of scenario results showed all evaluated OPAT service delivery models to be less costly than IP stay of equivalent duration. The extent of savings varied by OPAT healthcare delivery models. Estimated OPAT costs as a proportion of IP costs were estimated at 0.23-0.53 (skin and soft tissue infections), 0.34-0.46 (complex urinary tract infections), 0.22-0.41 (orthopaedic infections), 0.24-0.42 (diabetic foot infections) 0.40-0.56 (exacerbations of bronchiectasis) and 0.25-0.42 (intra-abdominal infections). Partial or full complex oral antibiotic therapies in orthopaedic or diabetic foot infections costs were estimated to be 0.13-0.26 of IP costs. Main OPAT costs were associated with staff time and antimicrobial medications.

**Conclusions** OPAT is a cost-effective use of National Health Service (NHS) resources for the treatment of a range of infections in the UK in patients who can be safely managed in a non-inpatient setting.

## Strengths and limitations of this study

- First study to use a bottom-up costing approach applied across a range of infections and healthcare delivery models in OPAT using UK-specific registry data
- First study to compare the cost of various models of care in OPAT with inpatient stay
- Base case results were consistent across a range of scenario analyses
- Assumed equivalence in OPAT and inpatient outcomes and between different OPAT models of care is associated with some uncertainty
- There are uncertainties in the quantification of some indirect OPAT costs (and their contribution to each OPAT model) and with inpatient bed day costs stay

## INTRODUCTION

Outpatient parenteral antimicrobial therapy (OPAT) is a well-established and safe method of delivering intravenous antimicrobial therapy to carefully selected patients in whom other aspects of care can be addressed without hospitalisation.<sup>1 2</sup> The British Society of Antimicrobial Chemotherapy (BSAC) have developed good practice recommendations for safe adult and paediatric OPAT practice and clinical governance including promotion of antimicrobial stewardship.<sup>2</sup> The recommendations acknowledged that a variety of OPAT delivery models were available and widely practised in the UK including home or clinic administration, administration by nurse or self/carer and administration via bolus or infusion. In 2015 BSAC launched the National Outcomes Registry System (NORS) for UK OPAT services in order to describe the OPAT landscape (including infections treated and antimicrobials used) and to enable participating centres to benchmark practice and outcomes.<sup>3</sup> Despite popularity and growth in OPAT practice in the UK, funding/reimbursement of OPAT has been inconsistent and as a result OPAT has not been uniformly established. A previous publication attempted to describe cost-effectiveness of OPAT in a tariff based UK health model for a single condition (cellulitis).<sup>4</sup> Herein we estimate OPAT related costs for a number of key indicator conditions utilising different established OPAT delivery models and compare with reference inpatient costs. The analysis also set out to take into account evolution of practice with greater use of supervised complex oral antibiotic therapies within the OPAT setting.<sup>5</sup>

## METHODS

The costs of six OPAT healthcare delivery models were estimated and compared against the cost of equivalent duration of inpatient stay for six key infection categories typically managed via OPAT in the UK. Based on available clinical evidence and clinical expert opinion, equivalence in patient outcomes was assumed for OPAT and inpatient stay as well as for the different models of healthcare delivery in OPAT.<sup>6-8</sup> A cost-minimisation analysis was therefore



deemed appropriate. A list of detailed costing model assumptions primarily based on the BSAC updated good practice recommendations<sup>2</sup> and clinical expert opinion is available in the supplementary materials (supplementary table 1).

### NORS data

The cost-minimisation analysis used five years of retrospective data relating to 21,632 adult treatment episodes collected from 57 OPAT centres (44 in England, 5 in Scotland, 4 in Wales and 4 in Northern Ireland), that all reported to NORS<sup>3</sup> (Table 1). In the cost-minimisation model, patients were treated in OPAT for one of six broadly defined infection categories, representing approximately 82% of primary OPAT diagnoses recorded in NORS. These were infections requiring short-term (up to 7 days) antimicrobial treatment such as skin and soft tissue infections including cellulitis (SSTI) and complex urinary tract infections (UTI) (including drug resistant lower UTI and pyelonephritis) or longer-term antimicrobial treatment such as bone and joint (including spinal, native osteomyelitis and orthopaedic metal work associated infections), diabetic foot infections (both osteomyelitis and complex soft tissue infections), bronchiectasis, and intra-abdominal infections (including liver abscess and other abdominal and pelvic infections)(supplementary table 2).

**Table 1 Average duration and total number of treatment episodes in OPAT for six categories of infection**

| Condition       | Average duration<br>(days) | Total number | Source                         |
|-----------------|----------------------------|--------------|--------------------------------|
| SSTI            | 6.4                        | 7,371        | NORS 2015-19 (UK) <sup>3</sup> |
| Complex UTI     | 7.0                        | 1,896        |                                |
| Bone-Joint      | 27.8                       | 5,355        |                                |
| Diabetic foot   | 28.3                       | 1,797        |                                |
| Bronchiectasis  | 11.0                       | 4,096        |                                |
| Intra-abdominal | 22.2                       | 1,117        |                                |

*SSTI, skin and soft tissue infections; UTI, urinary tract infections; NORS, National Outcomes Registry System*

### OPAT healthcare delivery models

1  
2  
3 The OPAT models considered were based on those currently practiced in the UK: outpatient  
4 clinic model, nurse home visits, self (or carer)-administration by a bolus IV, self-  
5 administration via an elastomeric device including continuous intravenous infusion (CIVI) of  
6 piperacillin with tazobactam or flucloxacillin and (for bone and joint or diabetic foot  
7 infections) complex outpatient antibiotic therapy (COpAT). Only suitable healthcare models  
8 were considered for the treatment of each of the six conditions in OPAT.  
9  
10  
11  
12  
13  
14

15 The care pathway for the outpatient clinic model requires a patient to travel daily to the  
16 OPAT unit following an initial assessment in hospital. At the clinic, an OPAT nurse prepares  
17 and administers antimicrobial medication intravenously by bolus IV. The nurse home visit  
18 model entails a specialist nurse (or a community based nurse) travelling to the patient's  
19 home instead.  
20  
21  
22  
23  
24

25 The self-administration model of OPAT care requires the patient (or carer) to administer the  
26 antimicrobials at home, without the need to travel to hospital or for a nurse to visit on a  
27 daily basis. It is assumed that prior to commencing antimicrobial self-administration,  
28 patients (or their carers) receive on average three training sessions (60 minutes each with a  
29 nurse) on how to safely prepare and administer their medication through a peripherally  
30 inserted central catheter (PICC) line using a bolus IV. It is further assumed that only one  
31 training session is required for patient/carer administration of pre-prepared medication via  
32 an elastomeric home infusion device which only needs to be connected to and disconnected  
33 from the PICC line correctly. The patient is discharged with the necessary consumables (e.g.  
34 a leaflet of instructions, syringes, needles, 70% alcohol wipes, 0.9% sodium chloride  
35 ampoules, sharps bin, vials with medication powder for infusion, etc.) and is given a contact  
36 number related to the OPAT service for use if any problems occur out of hours. On the  
37 occasion where an elastomeric pump is used for self-administration, these are commercially  
38 pre-filled devices due to safety issues regarding the process of reconstituting drugs into  
39 elastomeric devices outside of an aseptic unit and the associated reduction in shelf life  
40 (approximately 24 hours). A continuous intravenous infusion (CIVI) model of service delivery  
41 in OPAT involves reconstitution of drugs into elastomeric devices by hospital staff with  
42 piperacillin with tazobactam or flucloxacillin on the same day of administration with the  
43 patient visiting clinic once daily.<sup>9 10</sup>  
44  
45  
46  
47  
48  
49  
50  
51  
52  
53  
54  
55  
56  
57  
58  
59  
60

1  
2  
3 Patients referred to OPAT with bone and joint infections (e.g. diabetic foot and orthopaedic  
4 infections) are increasingly considered for suitability for discharge on supervised complex  
5 oral therapies as an alternative to “traditional” OPAT IV therapy. Suitable patients may be  
6 commenced directly onto supervised oral antimicrobial treatment which frequently requires  
7 enhanced monitoring due to potentially serious adverse events (e.g. linezolid or  
8 combination oral antibiotic regimens).<sup>5</sup>  
9  
10  
11  
12  
13  
14  
15  
16

17 In all OPAT models where treatment is required for > 1 week patients will also attend the  
18 OPAT clinic once weekly as a minimum and management/progress will be reviewed via a  
19 weekly virtual multi-disciplinary meeting.<sup>2</sup>  
20  
21  
22  
23  
24  
25  
26

### 27 **Antimicrobials**

28 Antimicrobial medications with a lower frequency of administration compared with  
29 inpatient care are primarily selected for use in OPAT. In the analysis, the type and  
30 distribution of antimicrobial medicines are based on clinical expert opinion and the most  
31 prevalent agents used within the NORS database (supplementary table 3).  
32  
33  
34  
35

36 Antimicrobial medicines which require more than once daily administration (e.g. piperacillin  
37 with tazobactam, flucloxacillin, temocillin, ceftazidime and meropenem) would be primarily  
38 administered by the patient or carer. However, if an antibiotic is stable to degradation in the  
39 outpatient setting (piperacillin with tazobactam and flucloxacillin), patients may receive the  
40 antibiotic via a 24-hour continuous infusion (CIVI) via an elastomeric device as an outpatient  
41 requiring once daily attendance. All other antimicrobial medicines where data on stability  
42 are either not available or are not compatible with 24-hour infusion may be administered  
43 with bolus IV or 30 minute IV infusion.  
44  
45  
46  
47  
48  
49  
50

### 51 **Re-hospitalization**

52 The cost-minimisation model assumed hospital re-admission to occur in 6.4% of treatment  
53 episodes in OPAT.<sup>7</sup> Re-hospitalised patients were assumed to only spend 50% of the  
54 duration of their treatment episode in OPAT.  
55  
56  
57  
58  
59  
60

## Costs

Costs considered in the analysis included specialist staff time (specialist nurses, infectious diseases consultant, and specialist antimicrobial/ clinical pharmacist), antimicrobial medications, elastomeric infusion devices (empty or commercially pre-filled), consumables, laboratory tests and the cost of travel to and from the OPAT clinic where necessary (supplementary tables 4 to 6). Additionally, costs of re-hospitalisation for patients in OPAT have been included. A daily “overhead” cost per patient to account for administration and support costs of using a healthcare service consistent with published literature has also been assumed in the analysis.<sup>8</sup>

Costs were obtained from various sources. These included the Personal and Social Services Research Unit (PSSRU)<sup>11</sup>, British National Formulary (BNF)<sup>12</sup>, drugs and pharmaceutical electronic market information tool (eMIT)<sup>13</sup>, National Procurement Scotland, Information Services Division (ISD) Scotland cost book<sup>14</sup> and NHS England reference costs<sup>15</sup>.

An appropriate healthcare resource group (HRG) code<sup>15</sup> was identified for each diagnosis to account for costs of inpatient care (supplementary table 7). Costs were based on a weighted average of excess bed day costs as elective and non-elective inpatient stay across various severity levels. No potential additional hospital costs were included.

## Patient and public involvement

No patient involved.

## RESULTS

Base case results from the cost-minimisation analysis are presented as estimated average cost per treatment episode in inpatient care and models of OPAT healthcare delivery, as well as cost of OPAT as a percentage of the estimated cost of inpatient stay (Tables 2 and 3). Total costs of models of care and savings associated with OPAT across all conditions included within the NORS data set are shown in supplementary table 8.

### ***Infections requiring short-term treatment***

#### *Skin and soft tissue infections (SSTI)*

1  
2  
3 In the cost-minimisation analysis, patients attending once daily for the duration of  
4 antimicrobial treatment, were primarily treated with IV ceftriaxone, but also with  
5 teicoplanin and daptomycin (for betalactam allergy). Treatment with the same medicines  
6 was assumed in the specialist nurse visit model. A small number of patients could also be  
7 treated with dalbavancin 1g as a one-off dose, consistent with clinical practice for patients  
8 unable to attend for daily treatment. Patients who were offered an elastomeric home  
9 infusion device were primarily treated with ceftriaxone once daily and less often with  
10 flucloxacillin as 24h (CIVI). Dependant on the OPAT service delivery model, the cost of  
11 treating patients with SSTI was estimated in the range of 25%-51% of the cost of inpatient  
12 stay for the equivalent duration of treatment.  
13  
14  
15  
16  
17  
18  
19  
20  
21

### 22 *Complex urinary tract infections (UTI)*

23  
24 In the analysis, patients were primarily treated with ertapenem (90%) and a minority of  
25 patients were treated with temocillin. It was assumed that patients attending daily or  
26 treated by a nurse at home were only given ertapenem due to twice daily dosing of  
27 temocillin. Both antibiotics can be self-administered using either short infusion or IV bolus  
28 respectively. No patients were assumed to be treated using home infusion elastomeric  
29 devices. Dependant on the OPAT service delivery model, the cost of treating patients with  
30 complex UTI was estimated in the range of 34%-46% of the cost of inpatient stay for the  
31 equivalent duration of treatment.  
32  
33  
34  
35  
36  
37  
38  
39  
40

### 41 *Infections requiring longer-term treatment*

#### 42 *Orthopaedic infections*

43  
44 Patients with orthopaedic infections were assumed to be treated once daily with  
45 ceftriaxone, teicoplanin or ertapenem in the outpatient visit, nurse home visit and self-  
46 administration OPAT service delivery models. Ceftriaxone was the only antimicrobial used  
47 for self-administration via commercially pre-filled elastomeric device. An analysis is also  
48 presented where patients were treated with oral therapies only or assuming IV to oral  
49 switch at different time points during supervised outpatient therapy. Dependant on the  
50 OPAT service delivery model (excluding oral therapies), the cost of treating patients with  
51 orthopaedic infections was estimated in the range of 22%-41% of the cost of inpatient stay  
52  
53  
54  
55  
56  
57  
58  
59  
60

1  
2  
3 for the equivalent duration of treatment. Additionally, a movement in treatment practice  
4 from IV to oral antibiotics could result in treatment cost of 13% to 24% of the cost of  
5 inpatient stay, dependent on how early a patient is switched to oral therapy.  
6  
7  
8

### 9 *Diabetic foot infections*

10  
11 Similarly to orthopaedic infections, patients with diabetic foot infections were assumed to  
12 be treated with ceftriaxone, ertapenem and teicoplanin, although the proportion of patients  
13 treated with each agent varied. All antimicrobial medicines are suitable for once daily  
14 administrations. The cost of treatment in OPAT was estimated in the range of 22%-42% of  
15 the cost of inpatient stay for the equivalent duration of treatment. Additionally, a  
16 movement in treatment practice from IV to oral antibiotics could result in treatment cost of  
17 13% to 26% of the cost of inpatient stay, dependent on how early a patient is switched to  
18 oral therapy.  
19  
20  
21  
22  
23  
24  
25  
26  
27

### 28 *Bronchiectasis*

29  
30 In the analysis, patients were assumed to be treated with either ceftazidime, meropenem or  
31 piperacillin with tazobactam. All medications are suitable for IV self-administration with  
32 either a bolus or 30 minute infusion. Only piperacillin with tazobactam was assumed to be  
33 administered with an elastomeric device via 24 hour continuous infusion in an outpatient  
34 setting (CIVI). The per-episode estimated cost for the same treatment plan with a visiting  
35 nurse is also presented. Since all of these medications require more than once daily  
36 administration or continuous daily administration, the general outpatient daily visits and  
37 nurse home visits OPAT service models are highly unlikely to be used in clinical practice so  
38 the results from CIVI models are presented instead. The estimated per treatment episode  
39 cost is in the range of 40%-56% of the cost of inpatient stay and varies with selected OPAT  
40 model of care.  
41  
42  
43  
44  
45  
46  
47  
48  
49  
50

### 51 *Intra-abdominal infections*

52  
53 In the cost-minimisation analysis, patients were primarily treated with ertapenem or  
54 piperacillin with tazobactam. The latter was assumed to be used only in patients who were  
55 suitable for self-administration or attend daily for change of elastomeric device (CIVI).  
56 Patients who visit daily for IV infusions or receive nurse visits were assumed to only be  
57  
58  
59  
60

1  
2  
3 treated with ertapenem. The estimated per treatment episode cost is in the range of 25%-  
4  
5 42% of the cost of inpatient stay and varies with selected OPAT model of care.  
6  
7  
8  
9  
10  
11  
12  
13  
14  
15  
16  
17  
18  
19  
20  
21  
22  
23  
24  
25  
26  
27  
28  
29  
30  
31  
32  
33  
34  
35  
36  
37  
38  
39  
40  
41  
42  
43  
44  
45  
46  
47  
48  
49  
50  
51  
52  
53  
54  
55  
56  
57  
58  
59  
60

For peer review only

**Table 2 Base case results – intravenous infusions**

| Condition                                       | Cost per treatment episode |     |             |     |                             |     |               |     |                |     |                 |     |
|-------------------------------------------------|----------------------------|-----|-------------|-----|-----------------------------|-----|---------------|-----|----------------|-----|-----------------|-----|
|                                                 | SSTI                       |     | Complex UTI |     | Orthopaedic -Bone and joint |     | Diabetic foot |     | Bronchiectasis |     | Intra-abdominal |     |
| Model of care                                   |                            |     |             |     |                             |     |               |     |                |     |                 |     |
| Inpatient stay                                  | £2,476                     | -   | £2,104      | -   | £8,279                      | -   | £8,428        | -   | £3,269         | -   | £7,124          | -   |
| OPAT - once daily visits                        | £631                       | 25% | £758        | 36% | £2,506                      | 30% | £2,671        | 32% | -              | -   | £2,312          | 32% |
| OPAT - specialist nurse daily home visit        | £831                       | 34% | £977        | 46% | £3,375                      | 41% | £3,556        | 42% | £1,839         | 56% | £3,006          | 42% |
| OPAT - self-administration - IV bolus           | £566                       | 23% | £720        | 34% | £1,855                      | 22% | £2,006        | 24% | £1,301         | 40% | £1,811          | 25% |
| OPAT - self-administration - elastomeric device | £611                       | 25% | -           | -   | £2,394                      | 29% | £2,433        | 29% | £1,588         | 49% | £2,952          | 41% |
| OPAT - elastomeric device (CIVI; outpatient)    | £802                       | 32% | -           | -   | -                           | -   | -             | -   | £1,495         | 46% | £2,807          | 39% |
| OPAT - once-off dalbavancin (1g)                | £1,266                     | 51% | -           | -   | -                           | -   | -             | -   | -              | -   | -               | -   |

SSTI, skin and soft tissue infections, UTI, urinary tract infections; OPAT, outpatient parenteral antimicrobial therapy; IV, intravenous; CIVI, continuous intravenous infusion;

**Table 3 Base case results – oral antimicrobials for orthopaedic and diabetic foot infections**

| Condition               | Orthopaedic/ Bone and joint |     | Diabetic foot |     |
|-------------------------|-----------------------------|-----|---------------|-----|
| Model of care           |                             |     |               |     |
| Inpatient stay          | £8,279                      |     | £8,428        |     |
| OPAT - Oral 100%        | £1,114                      | 13% | £1,089        | 13% |
| OPAT - Oral 25%; 75% IV | £2,009                      | 24% | £2,161        | 26% |
| OPAT - Oral 50%; 50% IV | £1,710                      | 21% | £1,816        | 22% |
| OPAT - Oral 75%; 25% IV | £1,410                      | 17% | £1,470        | 17% |

OPAT, outpatient parenteral antimicrobial therapies; IV, intravenous;



## Scenario analyses

In scenario analyses described in table 4, certain modelling assumptions were challenged to assess impact on results in the outpatient setting model. Detailed scenario analysis results are provided in supplementary table 9.

**Table 4 Scenarios: OPAT outpatient vs inpatient stay**

|                                      | Scenario                                                                                                 | Base case                                                                                                 |
|--------------------------------------|----------------------------------------------------------------------------------------------------------|-----------------------------------------------------------------------------------------------------------|
| 0                                    | Base case (outpatient)                                                                                   |                                                                                                           |
| 1                                    | Using cost of inpatient care in infectious disease unit (ISD Scotland) <sup>14</sup>                     | Using condition-specific healthcare resource group (HRG) costs <sup>15</sup>                              |
| 2                                    | Using ISD Scotland <sup>14</sup> cost for outpatient appointments and inpatient stay (IDU)               | Using micro-costing of nurse and consultant outpatient appointments                                       |
| 3                                    | Assuming overheads are 44.8% of total costs consistent with a published source <sup>16</sup>             | Assuming per day cost of using healthcare services consistent with a published source <sup>8</sup>        |
| 4                                    | Using BNF <sup>12</sup> as a source for the cost of linezolid (orthopaedic and diabetic foot infections) | Using eMIT <sup>13</sup> as a source for the cost of linezolid (orthopaedic and diabetic foot infections) |
| Skin and soft tissue infections only |                                                                                                          |                                                                                                           |
| 5                                    | Including the cost of consultant time                                                                    | Nurse-led condition; no consultant time                                                                   |
| 6                                    | Using the licensed dose of dalbavancin (1.5g) once off                                                   | Using dalbavancin 1g as a once-off treatment consistent with clinical practice                            |
| 7                                    | Using the licensed dose of dalbavancin 1g followed by 0.5g                                               | Using dalbavancin 1g as a once-off treatment consistent with clinical practice                            |

ISD, information services division; IDU, infectious disease unit; BNF, British National Formulary; eMIT, electronic market information tool;

Results from scenarios 1 and 2 (costs ranging between 21% and 34% of inpatient costs) are consistent, although lower than base case (25%-44%) across all infection categories due to the higher cost per bed day generally associated with an infectious disease unit.

Given the modelling approach, one of the uncertainties comes from the extent of model-specific per-patient overhead costs (scenario 3). The uncertainty is especially relevant to the outpatient clinic model. One study<sup>16</sup> reported overall overhead and support costs in the outpatient department of their infectious disease unit (IDU) to be 44.8% of total costs excluding re-hospitalization. When the equivalent assumption was made in the outpatient clinic model, the cost of treatment episode in OPAT did not increase over 52% of the cost of

1  
2  
3 inpatient stay, except for bronchiectasis (77%) which is treated with continuous intravenous  
4 infusion with elastomeric device as an outpatient visit once daily in the analysis which is  
5 generally associated with higher cost.  
6  
7

8  
9 There are uncertainties around the source of cost for linezolid for the oral treatment of  
10 orthopaedic and diabetic foot infections (scenario 4). The cost reported in the British  
11 National Formulary<sup>12</sup> is substantially higher than what clinicians have advised and also  
12 reported in the electronic market information tool (eMIT)<sup>13</sup> which has been used in the base  
13 case analysis. Using the higher cost of linezolid results in the cost of oral therapies  
14 increasing from 13% to 21% of the cost of inpatient stay.  
15  
16  
17  
18  
19

20  
21 Additionally, variations in the treatment protocol with dalbavancin seems to have the  
22 highest impact on costs of treatment of skin and soft tissue infections in OPAT due to the  
23 high medicine acquisition cost (scenarios 6 and 7). Treatment with dalbavancin can be as  
24 costly as 74-76% of the cost of inpatient stay.  
25  
26  
27  
28  
29  
30  
31

## 32 **DISCUSSION**

33  
34 Although OPAT has been developing in the UK over the last 25 years, and despite the clinical  
35 benefits of avoiding hospitalisation and keeping care closer to home, there remains wide  
36 variation in OPAT availability and inconsistency in funding/commissioning of services in the  
37 UK. It is possible that OPAT may be perceived as an additional healthcare cost and this could  
38 be a significant barrier to more systematic support for service development. This study  
39 therefore set out to systematically detail OPAT costs and compare with inpatient costs for  
40 key OPAT-treated conditions. To our knowledge, a detailed costing of various OPAT  
41 healthcare delivery models in a UK setting has not been published before. Nevertheless,  
42 results are consistent with previous studies where overall cost of OPAT have been reported  
43 and/or compared with the cost of inpatient care.<sup>6 16-18</sup> Key findings are that the self (or  
44 care)-administration model of care was associated with the lowest cost and nurse home  
45 visits generally had the highest estimated cost per treatment episode across all conditions  
46 evaluated. From all available OPAT models for patients with skin and soft tissue infections,  
47 treatment with a single dose of dalbavancin was estimated to have the highest cost.  
48  
49  
50  
51  
52  
53  
54  
55  
56  
57  
58  
59  
60

1  
2  
3 However, only a small proportion of patients (an estimated 5%) are expected to be treated  
4 with dalbavancin in clinical practice. As expected, oral therapies were the lowest cost  
5 treatment option for patients with orthopaedic (bone and joint) or diabetic foot infection. If  
6 patients are switched from IV as outpatient to oral therapies at least half way through their  
7 treatment duration, the results show the cost of treatment episode to be lower than the  
8 cost of self-administering IV antimicrobials for the whole treatment duration.  
9  
10  
11  
12  
13  
14

15 The cost-minimisation analysis found all OPAT service delivery models to be consistently  
16 associated with lower cost than inpatient stay of equivalent duration across a range of  
17 conditions in the UK NHS. The analysis shows the potential of OPAT to provide quality health  
18 care for suitable patients in an outpatient setting at a fraction of the cost of inpatient care.  
19 When the 4 most frequently used OPAT models of care (outpatient clinic, nurse home visit  
20 self (carer)-administration (bolus IV or elastomeric device) are considered individually, using  
21 NORS UK data<sup>3</sup>, the 5-year estimated savings to the UK National Health Service (NHS)  
22 associated with treatment in OPAT was found to be in the range of £60-77 million (Table  
23 S9). It should be noted that these data only relate to 57 OPAT services and many have not  
24 contributed data consistently for all 5 years (data not shown). The estimated cost savings to  
25 the NHS through systematic roll out of OPAT therefore is likely to be considerably higher.  
26  
27  
28  
29  
30  
31  
32  
33  
34  
35

36 Strengths of the presented analysis include a bottom-up costing approach applied across a  
37 range of infections, and healthcare delivery models in OPAT using UK-specific registry data.  
38 Furthermore, each of these estimated costs were compared against the cost of inpatient  
39 care in a UK setting and a comprehensive list of scenario analyses showed consistency with  
40 base case findings. However, the study also had some limitations. The assumption of  
41 equivalence in patient and treatment outcomes for OPAT and inpatient care as well as  
42 among various models of care in OPAT is based on published systematic reviews<sup>6-8</sup> but  
43 direct comparative evidence is lacking. Furthermore, there was one study<sup>8</sup> to suggest that a  
44 specialist nurse visit model is generally associated with better outcomes compared with  
45 other healthcare delivery models in OPAT. A published source was used for the cost of  
46 inpatient stay which is inconsistent with the bottom-up costing approach undertaken for the  
47 cost of OPAT.<sup>15</sup> The assumption of cost of bed day in the analysis to be equivalent to the  
48 cost of excess bed days, as reported in NHS England Reference costs<sup>15</sup>, is also associated  
49 with uncertainties due to the structure of the reimbursement system in NHS England (e.g.  
50  
51  
52  
53  
54  
55  
56  
57  
58  
59  
60

1  
2  
3 the presence of trim points). Nevertheless, this is considered to be the most suitable  
4 published source of costs of inpatient stay as it provides cost estimates for each of the six  
5 infection categories in the analysis. Lastly, the estimated average costs per treatment  
6 episode in OPAT aim to reflect existing OPAT services and thus set-up and implementation  
7 costs have not been included.  
8  
9  
10  
11  
12

13 It is important to note that most OPAT services will not rely on one particular delivery model  
14 and that individual patient factors such as, ability to self-administer or to attend the OPAT  
15 clinic, and choice of antimicrobial, will be the major determinants of the delivery model  
16 used. The data presented necessarily incorporate multiple variables to allow for variation  
17 based on patient need.  
18  
19  
20  
21  
22

23 OPAT is primarily about delivering high quality patient centered care closer to home whilst  
24 avoiding inherent risks associated with hospitalisation. These positive health economic  
25 findings should be utilised by OPAT clinician/practitioners, healthcare managers and policy  
26 makers alongside the already powerful clinical effectiveness and patient safety data to drive  
27 further OPAT development in the UK.  
28  
29  
30  
31  
32

33 **Acknowledgments:** This study was initiated on behalf of the British Society of Antimicrobial Chemotherapy UK  
34 OPAT initiative in conjunction with the Scottish Antimicrobial Prescribing group and is part of a broader OPAT  
35 health technology assessment performed by the Scottish Health Technology Group, Healthcare Improvement  
36 Scotland. Specific thanks to: Dr Felicity Drummond for access to and summary data from the National UK OPAT  
37 Registry and to the 57 UK OPAT services who have contributed to the NORS database; Healthcare  
38 Improvement Scotland: Jenny Harbour for summarizing relevant clinical evidence, Dr Carolyn Sleith for  
39 undertaking a literature search, Meryl Heggeland for checking to validity of the economic methods and results,  
40 Edward Clifton for general support with the project; for providing clinical advice: from NHS Lothian: Dr Claire  
41 Mackintosh and Sharon Watson; from NHS Tayside: Dr Busi Mooka, Dr Jorge Rojas Marcos and Gain Menzies;  
42 from NHS Fife: Dr David Griffith.  
43  
44  
45  
46  
47  
48

49 **Contributors:** MD: responsible for developing the economic model, completing the health economic analysis  
50 and preparation of the manuscript; RAS and MG: responsible for conceiving the concept of the study, advising  
51 on the development of the economic model and preparation of the manuscript. All authors have approved the  
52 final version of the manuscript.  
53  
54

55 **Funding:** This research received no specific grant from any funding agency in the public, commercial or not-for-  
56 profit sectors.

57 **Competing interests:** RAS and MG are co-leads of the BSAC UK OPAT initiative. RAS is the chair of the Scottish  
58 Antimicrobial Prescribing Group  
59  
60

1  
2  
3 **Patient consent for publication:** Not required

4 **Data sharing statement:** All data relevant to the study are included in the article or uploaded as  
5 supplementary information.

6 **Ethics statement:** Not applicable/ No human participants included  
7  
8  
9  
10  
11  
12  
13  
14  
15  
16  
17  
18  
19  
20  
21  
22

## 23 REFERENCES

- 24 1. Chapman ALN. Outpatient parenteral antimicrobial therapy. *BMJ* 2013;346:f1585.
- 25 2. Chapman ALN, Patel S, Horner C, et al. Updated good practice recommendations for  
26 outpatient parenteral antimicrobial therapy (OPAT) in adults and children in the UK. *JAC -*  
27 *Antimicrobial Resistance* 2019;1(2)
- 28 3. British Society for Antimicrobial Chemotherapy. National Outcomes Registry System  
29 (NORS) c2019 [2020 Oct 26]. Available from: <https://www.e-opat.com/opat-registry/>.
- 30 4. Jones GR, Cumming DV, Honeywell G, et al. How is income generated by outpatient  
31 parenteral antibiotic treatment (OPAT) in the UK? Analysis of payment tariffs for cellulitis.  
32 *Journal of Antimicrobial Chemotherapy* 2015;70(4):1236-40.
- 33 5. Seaton RA, Ritchie ND, Robb F, et al. From 'OPAT' to 'COpAT': implications of the OVIVA  
34 study for ambulatory management of bone and joint infection. *J Antimicrob Chemother*  
35 2019;74:2119-21.
- 36 6. Mitchell ED, Czoski Murray C, Meads D, et al. Clinical and cost-effectiveness, safety and  
37 acceptability of community intravenous antibiotic service models: CIVAS systematic review.  
38 *BMJ Open* 2017;7(4):e013560. doi: 10.1136/bmjopen-2016-013560 [published Online First:  
39 2017/04/22]
- 40 7. Srisankarajah S, Hobbs J, Roughead E, et al. Safety and effectiveness of 'hospital in the  
41 home' and 'outpatient parenteral antimicrobial therapy' in different age groups: A  
42 systematic review of observational studies. *Int J Clin Pract* 2018:e13216. doi:  
43 10.1111/ijcp.13216 [published Online First: 2018/06/20]
- 44 8. Minton J, Murray CC, Meads D, et al. The Community IntraVenous Antibiotic Study  
45 (CIVAS): a mixed-methods evaluation of patient preferences for and cost-effectiveness of  
46 different service models for delivering outpatient parenteral antimicrobial therapy. *NIHR*  
47 *Journals Library Health Services and Delivery Research* 2017;02:02.
- 48 9. Allwood MC, Stonkute D, Wallace A, et al. Assessment of the stability of citrate-buffered  
49 flucloxacillin for injection when stored in two commercially available ambulatory elastomeric  
50 devices: INFusor LV (Baxter) and Accufuser (Woo Young Medical): a study compliant with the  
51 NHS Yellow Cover Document (YCD) requirements. *Eur J Hosp Pharm* 2018;27(2):90-4.
- 52 10. Jamieson C, Ozolina L, Seaton RA, et al. Assessment of the stability of citrate-buffered  
53 piperacillin/tazobactam for continuous infusion when stored in two commercially available  
54  
55  
56  
57  
58  
59  
60

- 1  
2  
3 elastomeric devices for outpatient parenteral antimicrobial chemotherapy: a study  
4 compliant with the NHS Yellow Cover Document requirements. *Eur J Hosp Pharm* 2020  
5 11. PSSRU. Unit costs of health and social care 2020 [2020 October 28]. Available from:  
6 <https://www.pssru.ac.uk/project-pages/unit-costs/>.  
7  
8 12. BNF: British national formulary 2020 [2020 October 28]. Available from:  
9 <https://bnf.nice.org.uk>.  
10  
11 13. Department of Health. Drugs and pharmaceutical electronic market information tool  
12 (eMIT) 2020 [2020 October 28]. Available from:  
13 [https://www.gov.uk/government/publications/drugs-and-pharmaceutical-electronic-](https://www.gov.uk/government/publications/drugs-and-pharmaceutical-electronic-market-information-emit#:~:text=National%20Health%20Service-)  
14 [market-information-emit#:~:text=National%20Health%20Service-](https://www.gov.uk/government/publications/drugs-and-pharmaceutical-electronic-market-information-emit#:~:text=National%20Health%20Service-)  
15 [,Drugs%20and%20pharmaceutical%20electronic%20market%20information%20tool%20\(eM](https://www.gov.uk/government/publications/drugs-and-pharmaceutical-electronic-market-information-emit#:~:text=National%20Health%20Service-)  
16 [IT\),generic%20drugs%20and%20pharmaceutical%20products](https://www.gov.uk/government/publications/drugs-and-pharmaceutical-electronic-market-information-emit#:~:text=National%20Health%20Service-).  
17  
18 14. Public Health Scotland. Cost books 2018/19 2019 [2020 October 28]. Available from:  
19 <https://www.isdscotland.org/Health-Topics/Finance/Costs/Detailed-Tables/>.  
20  
21 15. NHS Digital. Reference costs: 2019-20 reference costs collection 2020 [2020 October 28].  
22 Available from: [https://digital.nhs.uk/data-and-information/data-collections-and-data-](https://digital.nhs.uk/data-and-information/data-collections-and-data-sets/data-collections/reference-costs)  
23 [sets/data-collections/reference-costs](https://digital.nhs.uk/data-and-information/data-collections-and-data-sets/data-collections/reference-costs).  
24  
25 16. Chapman ALN, Dixon S, Andrews D, et al. Clinical efficacy and cost-effectiveness of  
26 outpatient parenteral antibiotic therapy (OPAT): a UK perspective. *J Antimicrob Chemother*  
27 2009;64:1316-24.  
28  
29 17. Durojaiye OC, Bell H, Andrews D, et al. Clinical efficacy, cost analysis and patient  
30 acceptability of outpatient parenteral antibiotic therapy (OPAT): a decade of Sheffield (UK)  
31 OPAT service. *International Journal of Antimicrobial Agents* 2018;51(1):26-32.  
32  
33 18. Seaton RA, Johal S, Coia JE, et al. Economic evaluation of treatment for MRSA  
34 complicated skin and soft tissue infections in Glasgow hospitals. *European Journal of Clinical*  
35 *Microbiology & Infectious Diseases* 2014;33(3):305-11.  
36  
37  
38  
39  
40  
41  
42  
43  
44  
45  
46  
47  
48  
49  
50  
51  
52  
53  
54  
55  
56  
57  
58  
59  
60

## Supplementary tables:

## Supplementary table 1 Costing model assumptions

| No | Assumption                                                                                                                                                                                                                        | Source/Justification                                                                                                                                              |
|----|-----------------------------------------------------------------------------------------------------------------------------------------------------------------------------------------------------------------------------------|-------------------------------------------------------------------------------------------------------------------------------------------------------------------|
| 1  | All patients with long term infections are assessed on admission and upon discharge by a specialist consultant. Patients spend 30 minutes with a specialist consultant and 1h with a nurse at initial and final assessment.       | BSAC good practice recommendations (3.1-3.15); communication with clinical experts in OPAT.                                                                       |
| 2  | Skin and soft tissue infections are a nurse-led condition unless patient is treated with dalbavancin.                                                                                                                             | BSAC good practice recommendations (3.1-3.15); communication with clinical experts in OPAT.                                                                       |
| 3  | All patients with complex UTI are assessed by a consultant once.                                                                                                                                                                  | BSAC good practice recommendations (3.1-3.15); communication with clinical experts in OPAT.                                                                       |
| 4  | All patient are allocated 15 minutes of pharmacist time per treatment episode.                                                                                                                                                    | BSAC good practice recommendations (3.1-3.15); communication with clinical experts in OPAT.                                                                       |
| 5  | Laboratory tests including UE, LFT, FBC, C-reactive protein are done at initial and final assessment and once weekly for longer-term infections. Patients treated with teicoplanin receive weekly teicoplanin levels blood tests. | BSAC good practice recommendations (4.4); personal communication with clinical experts in OPAT.<br><br>Type of tests might vary with the choice of antimicrobial  |
| 6  | All patients requiring longer term treatment (more than 7 days), are assessed weekly at a MDT meeting. This is approx. 5 minutes of consultant, pharmacist and specialist nurse time per patient.                                 | BSAC good practice recommendations (4.2); personal communication with clinical experts in OPAT                                                                    |
| 7  | Each daily visit to outpatient clinic lasts 40 minutes during which a band 6 nurse examines the patient, prepares and administers medication. A nurse visiting patient's home would spend the equivalent amount of time.          | Personal communication with clinical experts in OPAT<br><br>This might be a conservative approach given that some antimicrobials are administered in 2-3 minutes. |
| 8  | Patients with infections requiring longer-term treatment who self-administer, visit the clinic once weekly for a check-up with a nurse and to have blood work done.                                                               | BSAC good practice recommendations (4.3); assumption                                                                                                              |
| 9  | Patients who self-administer with bolus IV receive 3 training sessions with a nurse (50:50 split band 5/band 6), each lasting 1 h. Patients who self-administer with elastomeric device receive 1 training session.               | Personal communication with clinical experts in OPAT.<br>Assumption<br>BSAC good practice recommendations (3.13);                                                 |

|    |                                                                                                                                                                                                                                                                                                                                                                                                                                                                                                        |                                                                                                                                                                                                                                                                                                                                                                                                                                                                                                                                      |
|----|--------------------------------------------------------------------------------------------------------------------------------------------------------------------------------------------------------------------------------------------------------------------------------------------------------------------------------------------------------------------------------------------------------------------------------------------------------------------------------------------------------|--------------------------------------------------------------------------------------------------------------------------------------------------------------------------------------------------------------------------------------------------------------------------------------------------------------------------------------------------------------------------------------------------------------------------------------------------------------------------------------------------------------------------------------|
| 10 | Single-use elastomeric devices administered in an outpatient setting (CIVI) are filled up by hospital staff (approximately 15 minutes of nurse's time).                                                                                                                                                                                                                                                                                                                                                | Assumption; Expert opinion;                                                                                                                                                                                                                                                                                                                                                                                                                                                                                                          |
| 11 | Single-use elastomeric devices used for self-administration are commercially pre-filled.                                                                                                                                                                                                                                                                                                                                                                                                               | Assumption; Expert opinion;                                                                                                                                                                                                                                                                                                                                                                                                                                                                                                          |
| 12 | Consumables: each patient receives 1 PICC line; per administration: 1 apron, 1 pair of gloves, 4 needles, 4 syringes, 1 pre-injection swab, 3 0.9% sodium chloride ampoules;                                                                                                                                                                                                                                                                                                                           | Personal communication with clinical experts in OPAT.<br>Assumption<br>Varies with method of administration                                                                                                                                                                                                                                                                                                                                                                                                                          |
| 13 | A nurse travelling to patients home would spend 33 minutes (non-patient contact time) per journey travelling with an ambulance car (£10.63 per journey). This is approximately 11 miles per journey.                                                                                                                                                                                                                                                                                                   | ISD Cost book for Scotland. This is an approximation due to lack of available data for distances travelled in OPAT. Distance travelled varies with geographic location. Longer distances might be travelled in the Highlands and islands in Scotland. It was assumed that this estimate for Scotland is relevant to UK.                                                                                                                                                                                                              |
| 14 | Type and distribution of medicines for each condition in the analysis are based on clinical expert opinion                                                                                                                                                                                                                                                                                                                                                                                             | NORS data do not link conditions to antimicrobials.                                                                                                                                                                                                                                                                                                                                                                                                                                                                                  |
| 15 | Cost of linezolid comes from eMIT; all other costs of antimicrobials come from the BNF (cheapest tariff)                                                                                                                                                                                                                                                                                                                                                                                               | A generic version of linezolid is used in OPAT but this is not reflected in the BNF. The BNF cost is substantially higher.                                                                                                                                                                                                                                                                                                                                                                                                           |
| 16 | Antimicrobials requiring more than once daily administration (temocillin, ceftazidime, meropenem and piperacillin with tazobactam) are assumed to be self-administered (bolus IV) only.                                                                                                                                                                                                                                                                                                                | More than once daily visit (hospital or nurse home visit) in OPAT are not primarily available options in clinical practice.                                                                                                                                                                                                                                                                                                                                                                                                          |
| 17 | Piperacillin with tazobactam, flucloxacillin and ceftriaxone are administered with commercially pre-filled elastomeric device in the six conditions included in the analysis. Only piperacillin with tazobactam and flucloxacillin can be administered with elastomeric device filled up by hospital staff.                                                                                                                                                                                            | BSAC good practice recommendations (3.12); Clinical expert opinion;                                                                                                                                                                                                                                                                                                                                                                                                                                                                  |
| 18 | For bronchiectasis: patients can travel daily to outpatient clinic for piperacillin with tazobactam (with buffered saline) to be administered as continuous IV with elastomeric device; Although the same model of care with piperacillin with tazobactam is available for the treatment of intra-abdominal infections, for simplicity only ertapenem was assumed to be used if patients attend clinic daily in the outpatient service delivery model. A CIVI as outpatient model is shown separately. | An assumption was made that if a patient attends the OPAT clinic daily or is visited by a nurse, the cheapest treatment option will be used in clinical practice. In the case of treating intra-abdominal infections, ertapenem once daily is cheaper than continuous piperacillin with tazobactam with elastomeric device.<br><br>In patients with bronchiectasis, continuous piperacillin with tazobactam with elastomeric device is the only treatment option in the hospital or nurse daily visits OPAT service delivery models. |



|    |                                                                                                                                    |                                                                                                                                                                                                                                                                                                                                                                                                                                                                                                                                                                                                                                                                                                                                                       |
|----|------------------------------------------------------------------------------------------------------------------------------------|-------------------------------------------------------------------------------------------------------------------------------------------------------------------------------------------------------------------------------------------------------------------------------------------------------------------------------------------------------------------------------------------------------------------------------------------------------------------------------------------------------------------------------------------------------------------------------------------------------------------------------------------------------------------------------------------------------------------------------------------------------|
| 19 | The cost of empty elastomeric devices is based on the average cost of 2 commercially available devices assuming equal market share | BSAC good practice recommendations (3.12); Clinical expert opinion;                                                                                                                                                                                                                                                                                                                                                                                                                                                                                                                                                                                                                                                                                   |
| 20 | A patient would spend the equivalent amount of time in hospital care in absence of OPAT                                            | Clinical expert opinion                                                                                                                                                                                                                                                                                                                                                                                                                                                                                                                                                                                                                                                                                                                               |
| 21 | A patient has a small probability (0.064) to be re-admitted to hospital half-way during their treatment in OPAT                    | Clinical effectiveness data; Clinical expert opinion                                                                                                                                                                                                                                                                                                                                                                                                                                                                                                                                                                                                                                                                                                  |
| 22 | Condition-specific HRG cost per excess bed day in hospital to estimate the cost of inpatient stay                                  | <p>The true cost per day of inpatient stay of patients who are eligible for OPAT is unknown. NHS England reference costs are considered a standard source of cost estimates associated with certain diagnoses or interventions. However, costs are presented as per episode of average treatment duration and cost of excess bed days if treatment goes beyond the expected treatment duration (trim point). Due to lack of better evidence, excess bed day costs were considered the best source of costs of inpatient stay for the purposes of this analysis.</p> <p>Condition-specific costs were selected to allow for granularity. However, costs were similar so assuming the same cost for each condition is also a reasonable assumption.</p> |

BSAC, British Society for Antimicrobial Chemotherapy; OPAT, Outpatient Parenteral Antimicrobial Therapy ; UTI, urinary tract infections ; UE, urea and electrolytes; LFT, liver function test; FBC, full blood count; MDT, multi-disciplinary team; IV, intravenous ;CIVI, continuous intravenous infusion; ISD, information services division; PICC, peripherally inserted central catheter ; HRG, health resource group ;eMIT, electronic market information tool ; BNF, British National Formulary ;

### Supplementary table 2 Breakdown of infection categories

| Infection category                      | Infection included in this category               |
|-----------------------------------------|---------------------------------------------------|
| Skin and soft tissue infections         | Cellulitis                                        |
|                                         | Other skin and soft tissue infections             |
| Orthopaedic infections (bone and joint) | Prosthetic joint infection (knee)                 |
|                                         | Osteomyelitis – native                            |
|                                         | Prosthetic joint infection (hip)                  |
|                                         | Osteomyelitis - surgically related                |
|                                         | Discitis/vertebral osteomyelitis                  |
|                                         | Prosthetic joint infection (other)                |
|                                         | Discitis/vertebral osteomyelitis - device related |
| Diabetic foot infections                | Osteomyelitis - diabetic foot                     |
|                                         | Diabetic foot infection - no osteomyelitis        |

|                                         |                                                                  |
|-----------------------------------------|------------------------------------------------------------------|
| <b>Complex urinary tract infections</b> | Drug resistant lower urinary tract infections and pyelonephritis |
| <b>Bronchiectasis</b>                   | Bronchiectasis                                                   |
|                                         | Other complex respiratory tract infection                        |
| <b>Intra-abdominal infections</b>       | Gastro-intestinal infection                                      |
|                                         | Hepatic abscess                                                  |
|                                         | Pelvic abscess                                                   |

**Supplementary table 3 Condition-specific antimicrobials in OPAT**

| <b>Condition</b>                             | <b>Medication</b>            | <b>Distribution</b> |
|----------------------------------------------|------------------------------|---------------------|
| <b>Skin and soft tissue infections (IV)</b>  | Ceftriaxone                  | 75%                 |
|                                              | Teicoplanin                  | 10%                 |
|                                              | Daptomycin                   | 5%                  |
|                                              | Flucloxacillin               | 5%                  |
|                                              | Dalbavancin                  | 5%                  |
| <b>Orthopaedic; Bone-Joint (IV)</b>          | Ceftriaxone                  | 60%                 |
|                                              | Teicoplanin                  | 30%                 |
|                                              | Ertapenem                    | 10%                 |
| <b>Orthopaedic; Bone-Joint (oral)</b>        | Ciprofloxacin/Rifampicin     | 25%                 |
|                                              | Levofloxacin/Rifampicin      | 12.50%              |
|                                              | Co-trimoxazole/Rifampicin    | 12.50%              |
|                                              | Clindamycin/Rifampicin       | 12.50%              |
|                                              | Linezolid/ciprofloxacin      | 12.50%              |
|                                              | Linezolid                    | 25%                 |
| <b>Diabetic foot (IV)</b>                    | Ceftriaxone                  | 45%                 |
|                                              | Teicoplanin                  | 10%                 |
|                                              | Ertapenem                    | 45%                 |
| <b>Diabetic foot (oral)</b>                  | Clindamycin/Doxycycline      | 25%                 |
|                                              | Clindamycin/Co-trimoxazole   | 12.50%              |
|                                              | Clindamycin/Ciprofloxacin    | 12.50%              |
|                                              | Linezolid/ciprofloxacin      | 12.50%              |
|                                              | Ciprofloxacin/Doxycycline    | 25.00%              |
|                                              | Levofloxacin/Doxycycline     | 12.50%              |
| <b>Complex urinary tract infections (IV)</b> | Ertapenem                    | 90%                 |
|                                              | Temocillin                   | 10%                 |
| <b>Bronchiectasis (IV)</b>                   | Ceftazidime                  | 70%                 |
|                                              | Piperacillin with tazobactam | 15%                 |
|                                              | Meropenem                    | 15%                 |
| <b>Intra-abdominal (IV)</b>                  | Ertapenem                    | 75%                 |
|                                              | Piperacillin with tazobactam | 25%                 |

IV, intravenous;

**Supplementary table 4 Unit costs of resources used in OPAT services**

| Item                                                                                       | Unit cost | Notes                                                                             | Source               |
|--------------------------------------------------------------------------------------------|-----------|-----------------------------------------------------------------------------------|----------------------|
| Medical consultant                                                                         | £109      | Per working hour                                                                  | PSSRU,2019           |
| Pharmacist band 8a                                                                         | £67       | Per working hour                                                                  | PSSRU,2019           |
| Nurse band 6                                                                               | £47       | Per working hour                                                                  | PSSRU,2019           |
| Nurse band 5                                                                               | £38       | Per working hour                                                                  | PSSRU,2019           |
| Antimicrobial medicine (IV)                                                                | Variable* | Condition-specific                                                                | BNF,2020, eMIT, 2020 |
| Antimicrobial medicine (oral)                                                              | Variable* | Condition-specific                                                                | BNF,2020, eMIT, 2020 |
| Laboratory tests                                                                           | £8        | UE,LFT,CRP and FBC                                                                | ISD Cost book,2020   |
| Laboratory tests (specialist)                                                              | £47       | Teicoplanin levels                                                                | Expert               |
| Consumables - PICC line                                                                    | £36       | Per patient                                                                       | National Procurement |
| Consumables - Butterfly needle                                                             | £1        | Per administration                                                                | National Procurement |
| Consumables (other)                                                                        | £1.65     | Single use; apron, needles, syringe, pre-injection swab                           | National Procurement |
| Elastomeric device; empty                                                                  | £31       | Based on equal market share of two devices (single use)                           | National Procurement |
| Elastomeric device; commercially pre-filled (piperacillin with tazobactam; flucloxacillin) | £90       | Per administration                                                                | Expert               |
| Elastomeric device; commercially pre-filled (ceftriaxone)                                  | £45       | Per administration                                                                | Expert               |
| Buffered saline                                                                            | £2        | Per administration                                                                | Expert               |
| Nurse travel                                                                               | £11       | Per journey - based on average travel of 11 miles                                 | ISD Cost book,2020   |
| Patient transport service                                                                  | £42       | Per journey - based on average travel of 11 miles                                 | ISD Cost book,2020   |
| General cost of using healthcare services (inflated)                                       | £13       | Per patient; per day (inflated to 2019 prices using the NHS cost inflation index) | Minton, 2017[3]      |

\*See tables S5 and S6 for costs of antimicrobials in OPAT

UE, urea and electrolytes; LFT, liver function test; CRP, c-reactive protein test; FBC, full blood count; PSSRU, Personal Social Services Research Unit; BNF, British National Formulary; eMIT, electronic market information tool; ISD, Information Services Division

**Supplementary table 5 Intravenously administered antimicrobials in OPAT**

| Medicines (IV) - BNF | Dose in OPAT | Frequency of administration | Cost per pack | Source    |
|----------------------|--------------|-----------------------------|---------------|-----------|
| Ceftriaxone          | 2g           | Once daily                  | £19.18        | BNF, 2020 |

|                                 |          |                                           |         |           |
|---------------------------------|----------|-------------------------------------------|---------|-----------|
| Teicoplanin                     | 600mg    | Once daily or 1200mg;<br>3 times per week | £3.93   | BNF, 2020 |
| Daptomycin                      | 700mg    | Once daily                                | £60.00  | BNF, 2020 |
| Flucloxacillin                  | 8g       | 24h infusion                              | £6.00   | BNF, 2020 |
| Dalbavancin                     | 1000 mg  | One-off                                   | £558.70 | BNF, 2020 |
| Ertapenem                       | 1g       | Once daily                                | £31.65  | BNF, 2020 |
| Temocillin                      | 2g       | every 12 h                                | £25.45  | BNF, 2020 |
| Ceftazidime                     | 2g       | 3 times a day                             | £17.59  | BNF, 2020 |
| Piperacillin with<br>tazobactam | 4.5g/18g | 4 times per day/24h<br>infusion           | £76.50  | BNF, 2020 |
| Meropenem                       | 1g       | 0.5-1g every 8 hours                      | £186.70 | BNF, 2020 |

IV, intravenous; BNF, British National Formulary

### Supplementary table 6 Oral antimicrobials for the treatment of orthopaedic and diabetic foot infections in OPAT

| Medicines (oral) | Dose in OPAT | Frequency of administration | Cost per pack | Source    |
|------------------|--------------|-----------------------------|---------------|-----------|
| Ciprofloxacin    | 750mg        | every 12h                   | £8.00         | BNF,2020  |
| Levofloxacin     | 500mg        | every 12h                   | £24.50        | BNF,2020  |
| Co-trimoxazole   | 960mg        | every 12h                   | £23.48        | BNF,2020  |
| Clindamycin      | 600mg        | every 8h                    | £38.23        | BNF,2020  |
| Linezolid        | 600mg        | every 12h                   | £7.48         | eMIT,2020 |
| Linezolid        | 600 mg       | every 12h                   | £327.24       | BNF, 2020 |
| Doxycycline      | 100mg        | every 12h                   | £1.64         | BNF,2020  |
| Rifampicin       | 400mg        | every 12h                   | £123.60       | BNF,2020  |
| Rifampicin       | 50mg         | every 12h                   | £54.69        | BNF,2020  |

BNF, British National Formulary

### Supplementary table 7 Condition-specific healthcare resource group (HRG) and bed-day cost of inpatient stay

| Condition                             | HRG code | Description                                                                                                                  | Cost | Source                                    |
|---------------------------------------|----------|------------------------------------------------------------------------------------------------------------------------------|------|-------------------------------------------|
| SSTI                                  | HD21 D-H | Soft Tissue Disorders with CC Score 0-12+                                                                                    | £387 | NHS<br>England<br>Reference<br>costs,2019 |
| Complex UTI                           | LA04 N-S | Kidney or Urinary Tract Infections, without Interventions, with CC Score 0-13+                                               | £301 |                                           |
| Orthopaedic /Diabetic foot infections | HD25 D-H | Infections of Bones or Joints, with CC Score 13+                                                                             | £298 |                                           |
|                                       | HE81 A-C | Infection or Inflammatory Reaction, due to, Internal Orthopaedic Prosthetic Devices, Implants or Grafts, with CC Score 0-13+ |      |                                           |
| Bronchiectasis                        | DZ23 M-N | Bronchopneumonia without Interventions, with CC Score 0-10                                                                   | £297 |                                           |
| Intra-abdominal                       | FD01 F-J | Gastrointestinal Infections without Interventions, with CC Score 8+                                                          | £321 |                                           |

SSTI, skin and soft tissue infections; UTI, urinary tract infections; NHS, National Health Service;

**Supplementary table 8 Total costs of models of care and savings associated with OPAT across all conditions included within the NORS data set**

| Model of care                                    | Total costs  | Total savings (OPAT) |
|--------------------------------------------------|--------------|----------------------|
| Inpatient stay                                   | £103,070,256 |                      |
| OPAT - once daily visits <sup>1</sup>            | £33,014,148  | £70,056,108          |
| OPAT - nurse home visits                         | £43,333,446  | £59,736,809          |
| OPAT - self-administration (bolus IV)            | £26,421,799  | £76,648,457          |
| OPAT - self-administration (device) <sup>2</sup> | £31,502,516  | £67,578,565          |

<sup>1</sup>bronchiectasis excluded; <sup>2</sup>complex urinary tract infections excluded;  
OPAT, outpatient parenteral antimicrobial therapy, IV, intravenous;

**Supplementary table 9 Scenario Analyses: Results**

| Scenario | SSTI | Complex UTI | Orthopaedic | Diabetic foot | Bronchiectasis | Intra-abdominal |
|----------|------|-------------|-------------|---------------|----------------|-----------------|
| 0        | 25%  | 36%         | 30%         | 32%           | 44%            | 32%             |
| 1        | 21%  | 25%         | 22%         | 22%           | 34%            | 24%             |
| 2        | 20%  | 28%         | 24%         | 24%           | 31%            | 25%             |
| 3        | 33%  | 52%         | 40%         | 44%           | 77%            | 46%             |
| 4        | -    | -           | 21%         | 21%           | -              | -               |
| 5        | 28%  | -           | -           | -             | -              | -               |
| 6        | 74%  | -           | -           | -             | -              | -               |
| 7        | 76%  | -           | -           | -             | -              | -               |

SSTI, skin and soft tissue infections; UTI, urinary tract infections
