# Supplementary material for: Outpatient parenteral antimicrobial therapy (OPAT) versus inpatient care in the UK: a health economic assessment for six key diagnoses
Source: PubMed Central journal article supplement — BMJ Open. 2021 Sep 28;11(9):e049733. doi: 10.1136/bmjopen-2021-049733 (PMC8479950; doi:10.1136/bmjopen-2021-049733), 2021-09-28
Supplement: bmjopen-2021-049733supp001.pdf [file bmjopen-2021-049733supp001.pdf]

**Supplementary tables:****Supplementary table 1 Costing model assumptions**

| No | Assumption                                                                                                                                                                                                                        | Source/Justification                                                                                                                                              |
|----|-----------------------------------------------------------------------------------------------------------------------------------------------------------------------------------------------------------------------------------|-------------------------------------------------------------------------------------------------------------------------------------------------------------------|
| 1  | All patients with long term infections are assessed on admission and upon discharge by a specialist consultant. Patients spend 30 minutes with a specialist consultant and 1h with a nurse at initial and final assessment.       | BSAC good practice recommendations (3.1-3.15); communication with clinical experts in OPAT.                                                                       |
| 2  | Skin and soft tissue infections are a nurse-led condition unless patient is treated with dalbavancin.                                                                                                                             | BSAC good practice recommendations (3.1-3.15); communication with clinical experts in OPAT.                                                                       |
| 3  | All patients with complex UTI are assessed by a consultant once.                                                                                                                                                                  | BSAC good practice recommendations (3.1-3.15); communication with clinical experts in OPAT.                                                                       |
| 4  | All patient are allocated 15 minutes of pharmacist time per treatment episode.                                                                                                                                                    | BSAC good practice recommendations (3.1-3.15); communication with clinical experts in OPAT.                                                                       |
| 5  | Laboratory tests including UE, LFT, FBC, C-reactive protein are done at initial and final assessment and once weekly for longer-term infections. Patients treated with teicoplanin receive weekly teicoplanin levels blood tests. | BSAC good practice recommendations (4.4); personal communication with clinical experts in OPAT.<br><br>Type of tests might vary with the choice of antimicrobial  |
| 6  | All patients requiring longer term treatment (more than 7 days), are assessed weekly at a MDT meeting. This is approx. 5 minutes of consultant, pharmacist and specialist nurse time per patient.                                 | BSAC good practice recommendations (4.2); personal communication with clinical experts in OPAT                                                                    |
| 7  | Each daily visit to outpatient clinic lasts 40 minutes during which a band 6 nurse examines the patient, prepares and administers medication. A nurse visiting patient's home would spend the equivalent amount of time.          | Personal communication with clinical experts in OPAT<br><br>This might be a conservative approach given that some antimicrobials are administered in 2-3 minutes. |
| 8  | Patients with infections requiring longer-term treatment who self-administer, visit the clinic once weekly for a check-up with a nurse and to have blood work done.                                                               | BSAC good practice recommendations (4.3); assumption                                                                                                              |
| 9  | Patients who self-administer with bolus IV receive 3 training sessions with a nurse (50:50 split band 5/band 6), each lasting 1 h. Patients who self-administer with elastomeric device receive 1 training session.               | Personal communication with clinical experts in OPAT.<br>Assumption<br>BSAC good practice recommendations (3.13);                                                 |

|    |                                                                                                                                                                                                                                                                                                                                                                                                                                                                                                        |                                                                                                                                                                                                                                                                                                                                                                                                                                                                                                                                      |
|----|--------------------------------------------------------------------------------------------------------------------------------------------------------------------------------------------------------------------------------------------------------------------------------------------------------------------------------------------------------------------------------------------------------------------------------------------------------------------------------------------------------|--------------------------------------------------------------------------------------------------------------------------------------------------------------------------------------------------------------------------------------------------------------------------------------------------------------------------------------------------------------------------------------------------------------------------------------------------------------------------------------------------------------------------------------|
| 10 | Single-use elastomeric devices administered in an outpatient setting (CIVI) are filled up by hospital staff (approximately 15 minutes of nurse's time).                                                                                                                                                                                                                                                                                                                                                | Assumption; Expert opinion;                                                                                                                                                                                                                                                                                                                                                                                                                                                                                                          |
| 11 | Single-use elastomeric devices used for self-administration are commercially pre-filled.                                                                                                                                                                                                                                                                                                                                                                                                               | Assumption; Expert opinion;                                                                                                                                                                                                                                                                                                                                                                                                                                                                                                          |
| 12 | Consumables: each patient receives 1 PICC line; per administration: 1 apron, 1 pair of gloves, 4 needles, 4 syringes, 1 pre-injection swab, 3 0.9% sodium chloride ampoules;                                                                                                                                                                                                                                                                                                                           | Personal communication with clinical experts in OPAT.<br>Assumption<br>Varies with method of administration                                                                                                                                                                                                                                                                                                                                                                                                                          |
| 13 | A nurse travelling to patients home would spend 33 minutes (non-patient contact time) per journey travelling with an ambulance car (£10.63 per journey). This is approximately 11 miles per journey.                                                                                                                                                                                                                                                                                                   | ISD Cost book for Scotland. This is an approximation due to lack of available data for distances travelled in OPAT. Distance travelled varies with geographic location. Longer distances might be travelled in the Highlands and islands in Scotland. It was assumed that this estimate for Scotland is relevant to UK.                                                                                                                                                                                                              |
| 14 | Type and distribution of medicines for each condition in the analysis are based on clinical expert opinion                                                                                                                                                                                                                                                                                                                                                                                             | NORS data do not link conditions to antimicrobials.                                                                                                                                                                                                                                                                                                                                                                                                                                                                                  |
| 15 | Cost of linezolid comes from eMIT; all other costs of antimicrobials come from the BNF (cheapest tariff)                                                                                                                                                                                                                                                                                                                                                                                               | A generic version of linezolid is used in OPAT but this is not reflected in the BNF. The BNF cost is substantially higher.                                                                                                                                                                                                                                                                                                                                                                                                           |
| 16 | Antimicrobials requiring more than once daily administration (temocillin, ceftazidime, meropenem and piperacillin with tazobactam) are assumed to be self-administered (bolus IV) only.                                                                                                                                                                                                                                                                                                                | More than once daily visit (hospital or nurse home visit) in OPAT are not primarily available options in clinical practice.                                                                                                                                                                                                                                                                                                                                                                                                          |
| 17 | Piperacillin with tazobactam, flucloxacillin and ceftriaxone are administered with commercially pre-filled elastomeric device in the six conditions included in the analysis. Only piperacillin with tazobactam and flucloxacillin can be administered with elastomeric device filled up by hospital staff.                                                                                                                                                                                            | BSAC good practice recommendations (3.12); Clinical expert opinion;                                                                                                                                                                                                                                                                                                                                                                                                                                                                  |
| 18 | For bronchiectasis: patients can travel daily to outpatient clinic for piperacillin with tazobactam (with buffered saline) to be administered as continuous IV with elastomeric device; Although the same model of care with piperacillin with tazobactam is available for the treatment of intra-abdominal infections, for simplicity only ertapenem was assumed to be used if patients attend clinic daily in the outpatient service delivery model. A CIVI as outpatient model is shown separately. | An assumption was made that if a patient attends the OPAT clinic daily or is visited by a nurse, the cheapest treatment option will be used in clinical practice. In the case of treating intra-abdominal infections, ertapenem once daily is cheaper than continuous piperacillin with tazobactam with elastomeric device.<br><br>In patients with bronchiectasis, continuous piperacillin with tazobactam with elastomeric device is the only treatment option in the hospital or nurse daily visits OPAT service delivery models. |

|    |                                                                                                                                    |                                                                                                                                                                                                                                                                                                                                                                                                                                                                                                                                                                                                                                                                                                                                                       |
|----|------------------------------------------------------------------------------------------------------------------------------------|-------------------------------------------------------------------------------------------------------------------------------------------------------------------------------------------------------------------------------------------------------------------------------------------------------------------------------------------------------------------------------------------------------------------------------------------------------------------------------------------------------------------------------------------------------------------------------------------------------------------------------------------------------------------------------------------------------------------------------------------------------|
| 19 | The cost of empty elastomeric devices is based on the average cost of 2 commercially available devices assuming equal market share | BSAC good practice recommendations (3.12); Clinical expert opinion;                                                                                                                                                                                                                                                                                                                                                                                                                                                                                                                                                                                                                                                                                   |
| 20 | A patient would spend the equivalent amount of time in hospital care in absence of OPAT                                            | Clinical expert opinion                                                                                                                                                                                                                                                                                                                                                                                                                                                                                                                                                                                                                                                                                                                               |
| 21 | A patient has a small probability (0.064) to be re-admitted to hospital half-way during their treatment in OPAT                    | Clinical effectiveness data; Clinical expert opinion                                                                                                                                                                                                                                                                                                                                                                                                                                                                                                                                                                                                                                                                                                  |
| 22 | Condition-specific HRG cost per excess bed day in hospital to estimate the cost of inpatient stay                                  | <p>The true cost per day of inpatient stay of patients who are eligible for OPAT is unknown. NHS England reference costs are considered a standard source of cost estimates associated with certain diagnoses or interventions. However, costs are presented as per episode of average treatment duration and cost of excess bed days if treatment goes beyond the expected treatment duration (trim point). Due to lack of better evidence, excess bed day costs were considered the best source of costs of inpatient stay for the purposes of this analysis.</p> <p>Condition-specific costs were selected to allow for granularity. However, costs were similar so assuming the same cost for each condition is also a reasonable assumption.</p> |

BSAC, British Society for Antimicrobial Chemotherapy; OPAT, Outpatient Parenteral Antimicrobial Therapy ; UTI, urinary tract infections ; UE, urea and electrolytes; LFT, liver function test; FBC, full blood count; MDT, multi-disciplinary team; IV, intravenous ;CIVL, continuous intravenous infusion; ISD, information services division; PICC, peripherally inserted central catheter ; HRG, health resource group ;eMIT, electronic market information tool ; BNF, British National Formulary ;

### Supplementary table 2 Breakdown of infection categories

| Infection category                             | Infection included in this category               |
|------------------------------------------------|---------------------------------------------------|
| <b>Skin and soft tissue infections</b>         | Cellulitis                                        |
|                                                | Other skin and soft tissue infections             |
| <b>Orthopaedic infections (bone and joint)</b> | Prosthetic joint infection (knee)                 |
|                                                | Osteomyelitis – native                            |
|                                                | Prosthetic joint infection (hip)                  |
|                                                | Osteomyelitis - surgically related                |
|                                                | Discitis/vertebral osteomyelitis                  |
|                                                | Prosthetic joint infection (other)                |
|                                                | Discitis/vertebral osteomyelitis - device related |
|                                                | Osteomyelitis (other)                             |
| <b>Diabetic foot infections</b>                | Osteomyelitis - diabetic foot                     |
|                                                | Diabetic foot infection - no osteomyelitis        |

|                                         |                                                                  |
|-----------------------------------------|------------------------------------------------------------------|
| <b>Complex urinary tract infections</b> | Drug resistant lower urinary tract infections and pyelonephritis |
| <b>Bronchiectasis</b>                   | Bronchiectasis                                                   |
|                                         | Other complex respiratory tract infection                        |
| <b>Intra-abdominal infections</b>       | Gastro-intestinal infection                                      |
|                                         | Hepatic abscess                                                  |
|                                         | Pelvic abscess                                                   |

**Supplementary table 3 Condition-specific antimicrobials in OPAT**

| <b>Condition</b>                             | <b>Medication</b>            | <b>Distribution</b> |
|----------------------------------------------|------------------------------|---------------------|
| <b>Skin and soft tissue infections (IV)</b>  | Ceftriaxone                  | 75%                 |
|                                              | Teicoplanin                  | 10%                 |
|                                              | Daptomycin                   | 5%                  |
|                                              | Flucloxacillin               | 5%                  |
|                                              | Dalbavancin                  | 5%                  |
| <b>Orthopaedic; Bone-Joint (IV)</b>          | Ceftriaxone                  | 60%                 |
|                                              | Teicoplanin                  | 30%                 |
|                                              | Ertapenem                    | 10%                 |
| <b>Orthopaedic; Bone-Joint (oral)</b>        | Ciprofloxacin/Rifampicin     | 25%                 |
|                                              | Levofloxacin/Rifampicin      | 12.50%              |
|                                              | Co-trimoxazole/Rifampicin    | 12.50%              |
|                                              | Clindamycin/Rifampicin       | 12.50%              |
|                                              | Linezolid/ciprofloxacin      | 12.50%              |
|                                              | Linezolid                    | 25%                 |
| <b>Diabetic foot (IV)</b>                    | Ceftriaxone                  | 45%                 |
|                                              | Teicoplanin                  | 10%                 |
|                                              | Ertapenem                    | 45%                 |
| <b>Diabetic foot (oral)</b>                  | Clindamycin/Doxycycline      | 25%                 |
|                                              | Clindamycin/Co-trimoxazole   | 12.50%              |
|                                              | Clindamycin/Ciprofloxacin    | 12.50%              |
|                                              | Linezolid/ciprofloxacin      | 12.50%              |
|                                              | Ciprofloxacin/Doxycycline    | 25.00%              |
|                                              | Levofloxacin/Doxycycline     | 12.50%              |
| <b>Complex urinary tract infections (IV)</b> | Ertapenem                    | 90%                 |
|                                              | Temocillin                   | 10%                 |
| <b>Bronchiectasis (IV)</b>                   | Ceftazidime                  | 70%                 |
|                                              | Piperacillin with tazobactam | 15%                 |
|                                              | Meropenem                    | 15%                 |
| <b>Intra-abdominal (IV)</b>                  | Ertapenem                    | 75%                 |
|                                              | Piperacillin with tazobactam | 25%                 |

IV, intravenous;

**Supplementary table 4 Unit costs of resources used in OPAT services**

| Item                                                                                       | Unit cost | Notes                                                                             | Source               |
|--------------------------------------------------------------------------------------------|-----------|-----------------------------------------------------------------------------------|----------------------|
| Medical consultant                                                                         | £109      | Per working hour                                                                  | PSSRU,2019           |
| Pharmacist band 8a                                                                         | £67       | Per working hour                                                                  | PSSRU,2019           |
| Nurse band 6                                                                               | £47       | Per working hour                                                                  | PSSRU,2019           |
| Nurse band 5                                                                               | £38       | Per working hour                                                                  | PSSRU,2019           |
| Antimicrobial medicine (IV)                                                                | Variable* | Condition-specific                                                                | BNF,2020, eMIT, 2020 |
| Antimicrobial medicine (oral)                                                              | Variable* | Condition-specific                                                                | BNF,2020, eMIT, 2020 |
| Laboratory tests                                                                           | £8        | UE,LFT,CRP and FBC                                                                | ISD Cost book,2020   |
| Laboratory tests (specialist)                                                              | £47       | Teicoplanin levels                                                                | Expert               |
| Consumables - PICC line                                                                    | £36       | Per patient                                                                       | National Procurement |
| Consumables - Butterfly needle                                                             | £1        | Per administration                                                                | National Procurement |
| Consumables (other)                                                                        | £1.65     | Single use; apron, needles, syringe, pre-injection swab                           | National Procurement |
| Elastomeric device; empty                                                                  | £31       | Based on equal market share of two devices (single use)                           | National Procurement |
| Elastomeric device; commercially pre-filled (piperacillin with tazobactam; flucloxacillin) | £90       | Per administration                                                                | Expert               |
| Elastomeric device; commercially pre-filled (ceftriaxone)                                  | £45       | Per administration                                                                | Expert               |
| Buffered saline                                                                            | £2        | Per administration                                                                | Expert               |
| Nurse travel                                                                               | £11       | Per journey - based on average travel of 11 miles                                 | ISD Cost book,2020   |
| Patient transport service                                                                  | £42       | Per journey - based on average travel of 11 miles                                 | ISD Cost book,2020   |
| General cost of using healthcare services (inflated)                                       | £13       | Per patient; per day (inflated to 2019 prices using the NHS cost inflation index) | Minton, 2017[3]      |

\*See tables S5 and S6 for costs of antimicrobials in OPAT

UE, urea and electrolytes; LFT, liver function test; CRP, c-reactive protein test; FBC, full blood count; PSSRU, Personal Social Services Research Unit; BNF, British National Formulary; eMIT, electronic market information tool; ISD, Information Services Division

**Supplementary table 5 Intravenously administered antimicrobials in OPAT**

| Medicines (IV) - BNF | Dose in OPAT | Frequency of administration | Cost per pack | Source    |
|----------------------|--------------|-----------------------------|---------------|-----------|
| Ceftriaxone          | 2g           | Once daily                  | £19.18        | BNF, 2020 |

|                                 |          |                                           |         |           |
|---------------------------------|----------|-------------------------------------------|---------|-----------|
| Teicoplanin                     | 600mg    | Once daily or 1200mg;<br>3 times per week | £3.93   | BNF, 2020 |
| Daptomycin                      | 700mg    | Once daily                                | £60.00  | BNF, 2020 |
| Flucloxacillin                  | 8g       | 24h infusion                              | £6.00   | BNF, 2020 |
| Dalbavancin                     | 1000 mg  | One-off                                   | £558.70 | BNF, 2020 |
| Ertapenem                       | 1g       | Once daily                                | £31.65  | BNF, 2020 |
| Temocillin                      | 2g       | every 12 h                                | £25.45  | BNF, 2020 |
| Ceftazidime                     | 2g       | 3 times a day                             | £17.59  | BNF, 2020 |
| Piperacillin with<br>tazobactam | 4.5g/18g | 4 times per day/24h<br>infusion           | £76.50  | BNF, 2020 |
| Meropenem                       | 1g       | 0.5-1g every 8 hours                      | £186.70 | BNF, 2020 |

IV, intravenous; BNF, British National Formulary

### Supplementary table 6 Oral antimicrobials for the treatment of orthopaedic and diabetic foot infections in OPAT

| Medicines (oral) | Dose in OPAT | Frequency of administration | Cost per pack | Source    |
|------------------|--------------|-----------------------------|---------------|-----------|
| Ciprofloxacin    | 750mg        | every 12h                   | £8.00         | BNF,2020  |
| Levofloxacin     | 500mg        | every 12h                   | £24.50        | BNF,2020  |
| Co-trimoxazole   | 960mg        | every 12h                   | £23.48        | BNF,2020  |
| Clindamycin      | 600mg        | every 8h                    | £38.23        | BNF,2020  |
| Linezolid        | 600mg        | every 12h                   | £7.48         | eMIT,2020 |
| Linezolid        | 600 mg       | every 12h                   | £327.24       | BNF, 2020 |
| Doxycycline      | 100mg        | every 12h                   | £1.64         | BNF,2020  |
| Rifampicin       | 400mg        | every 12h                   | £123.60       | BNF,2020  |
| Rifampicin       | 50mg         | every 12h                   | £54.69        | BNF,2020  |

BNF, British National Formulary

### Supplementary table 7 Condition-specific healthcare resource group (HRG) and bed-day cost of inpatient stay

| Condition                             | HRG code | Description                                                                                                                  | Cost | Source                                    |
|---------------------------------------|----------|------------------------------------------------------------------------------------------------------------------------------|------|-------------------------------------------|
| SSTI                                  | HD21 D-H | Soft Tissue Disorders with CC Score 0-12+                                                                                    | £387 | NHS<br>England<br>Reference<br>costs,2019 |
| Complex UTI                           | LA04 N-S | Kidney or Urinary Tract Infections, without Interventions, with CC Score 0-13+                                               | £301 |                                           |
| Orthopaedic /Diabetic foot infections | HD25 D-H | Infections of Bones or Joints, with CC Score 13+                                                                             | £298 |                                           |
|                                       | HE81 A-C | Infection or Inflammatory Reaction, due to, Internal Orthopaedic Prosthetic Devices, Implants or Grafts, with CC Score 0-13+ |      |                                           |
| Bronchiectasis                        | DZ23 M-N | Bronchopneumonia without Interventions, with CC Score 0-10                                                                   | £297 |                                           |
| Intra-abdominal                       | FD01 F-J | Gastrointestinal Infections without Interventions, with CC Score 8+                                                          | £321 |                                           |

SSTI, skin and soft tissue infections; UTI, urinary tract infections; NHS, National Health Service;

**Supplementary table 8 Total costs of models of care and savings associated with OPAT across all conditions included within the NORS data set**

| Model of care                                    | Total costs  | Total savings (OPAT) |
|--------------------------------------------------|--------------|----------------------|
| Inpatient stay                                   | £103,070,256 |                      |
| OPAT - once daily visits <sup>1</sup>            | £33,014,148  | £70,056,108          |
| OPAT - nurse home visits                         | £43,333,446  | £59,736,809          |
| OPAT - self-administration (bolus IV)            | £26,421,799  | £76,648,457          |
| OPAT - self-administration (device) <sup>2</sup> | £31,502,516  | £67,578,565          |

<sup>1</sup>bronchiectasis excluded; <sup>2</sup>complex urinary tract infections excluded;  
OPAT, outpatient parenteral antimicrobial therapy, IV, intravenous;

**Supplementary table 9 Scenario Analyses: Results**

| Scenario | SSTI | Complex UTI | Orthopaedic | Diabetic foot | Bronchiectasis | Intra-abdominal |
|----------|------|-------------|-------------|---------------|----------------|-----------------|
| 0        | 25%  | 36%         | 30%         | 32%           | 44%            | 32%             |
| 1        | 21%  | 25%         | 22%         | 22%           | 34%            | 24%             |
| 2        | 20%  | 28%         | 24%         | 24%           | 31%            | 25%             |
| 3        | 33%  | 52%         | 40%         | 44%           | 77%            | 46%             |
| 4        | -    | -           | 21%         | 21%           | -              | -               |
| 5        | 28%  | -           | -           | -             | -              | -               |
| 6        | 74%  | -           | -           | -             | -              | -               |
| 7        | 76%  | -           | -           | -             | -              | -               |

SSTI, skin and soft tissue infections; UTI, urinary tract infections
